# Supplementary material
Source: PubMed Central journal article supplement (PMC3733332)

## **An Efficient Synthesis of the Fully Elaborated Isoindolinone Unit of Muironolide A**

Qing Xiao, Kyle Young, Armen Zakarian\*

Department of Chemistry and Biochemistry, University of California, Santa Barbara, CA 93106,  
Telephone: (805)-893-3717; Fax: (805)-893-4120; E-mail: zakarian@chem.ucsb.edu

### **SUPPORTING INFORMATION 2**

Copies of <sup>1</sup>H, <sup>13</sup>C NMR, NOE, NOESY, and COSY spectra

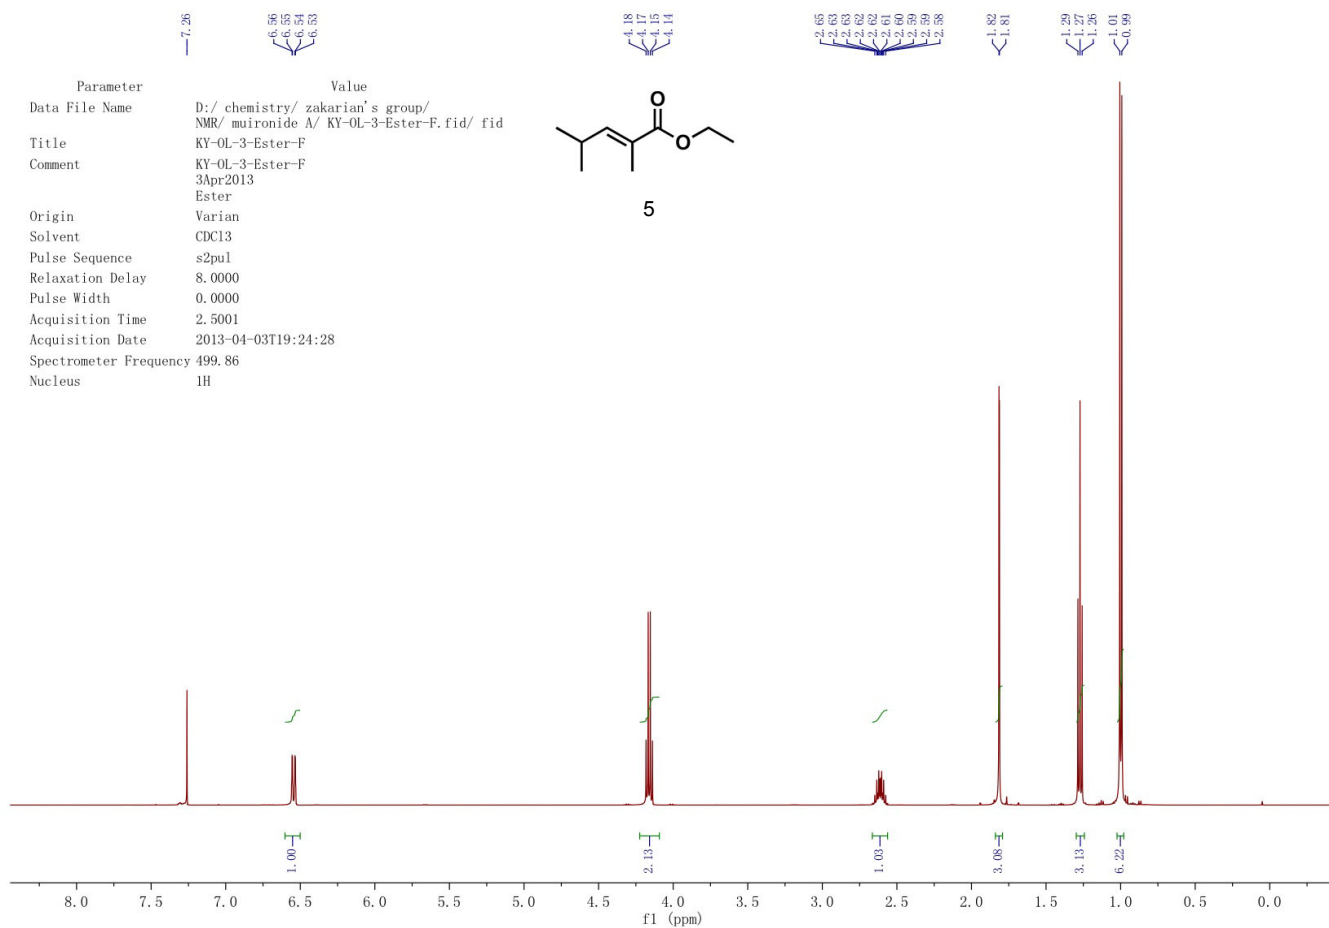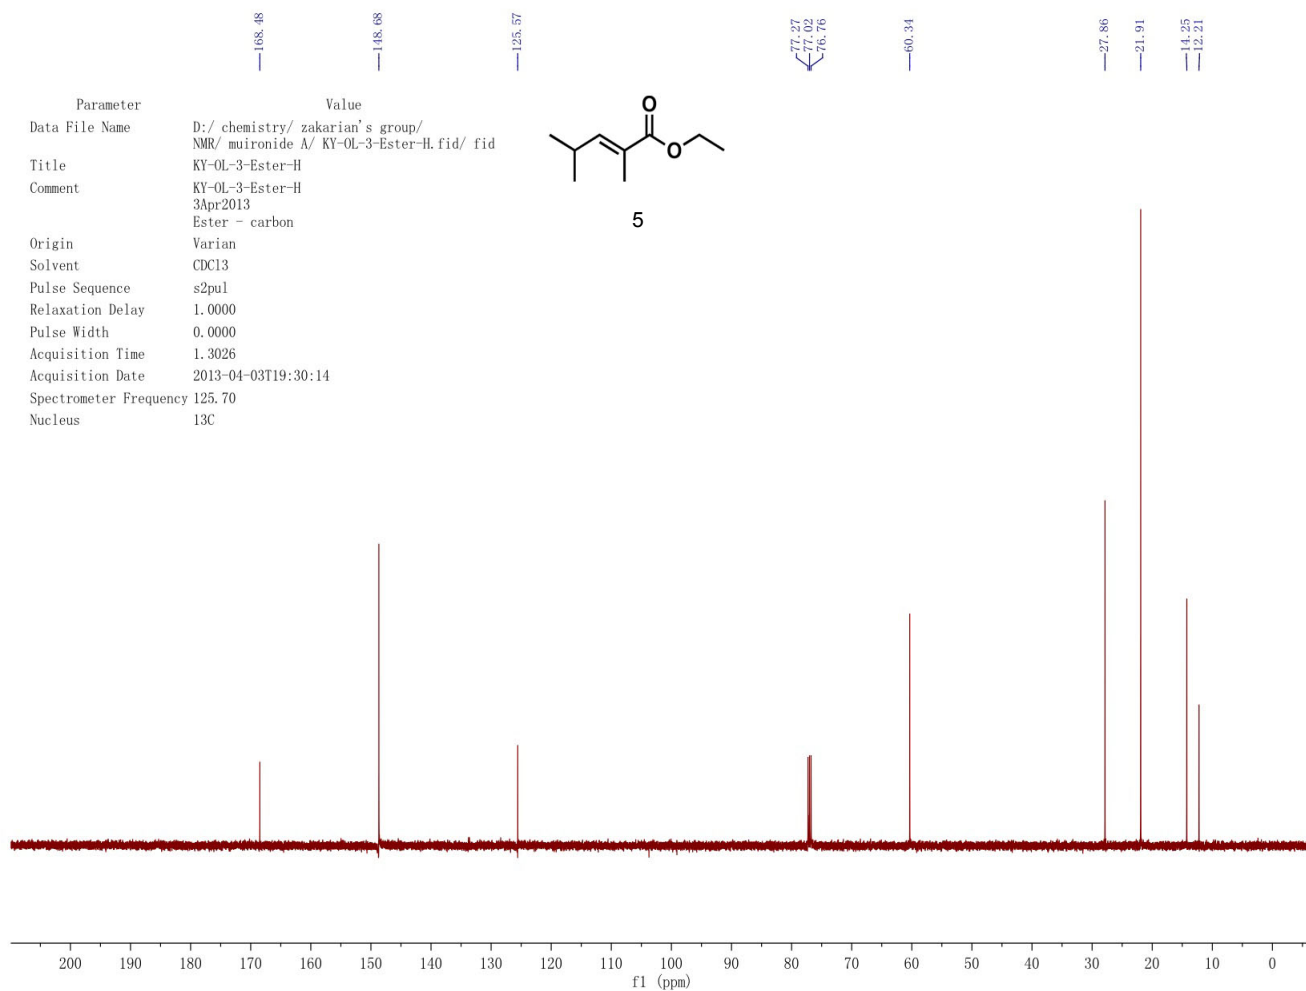

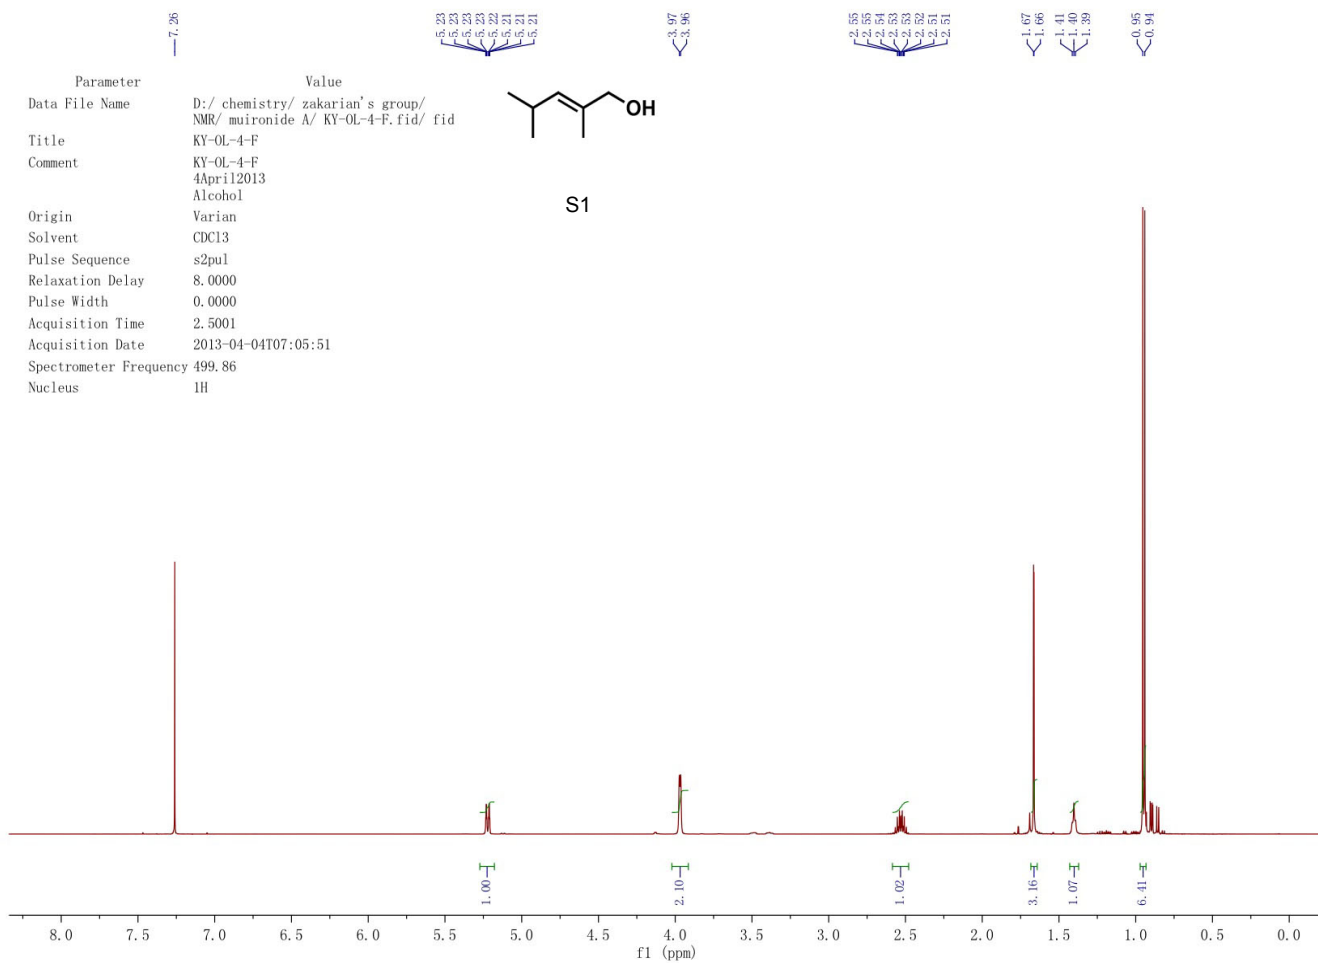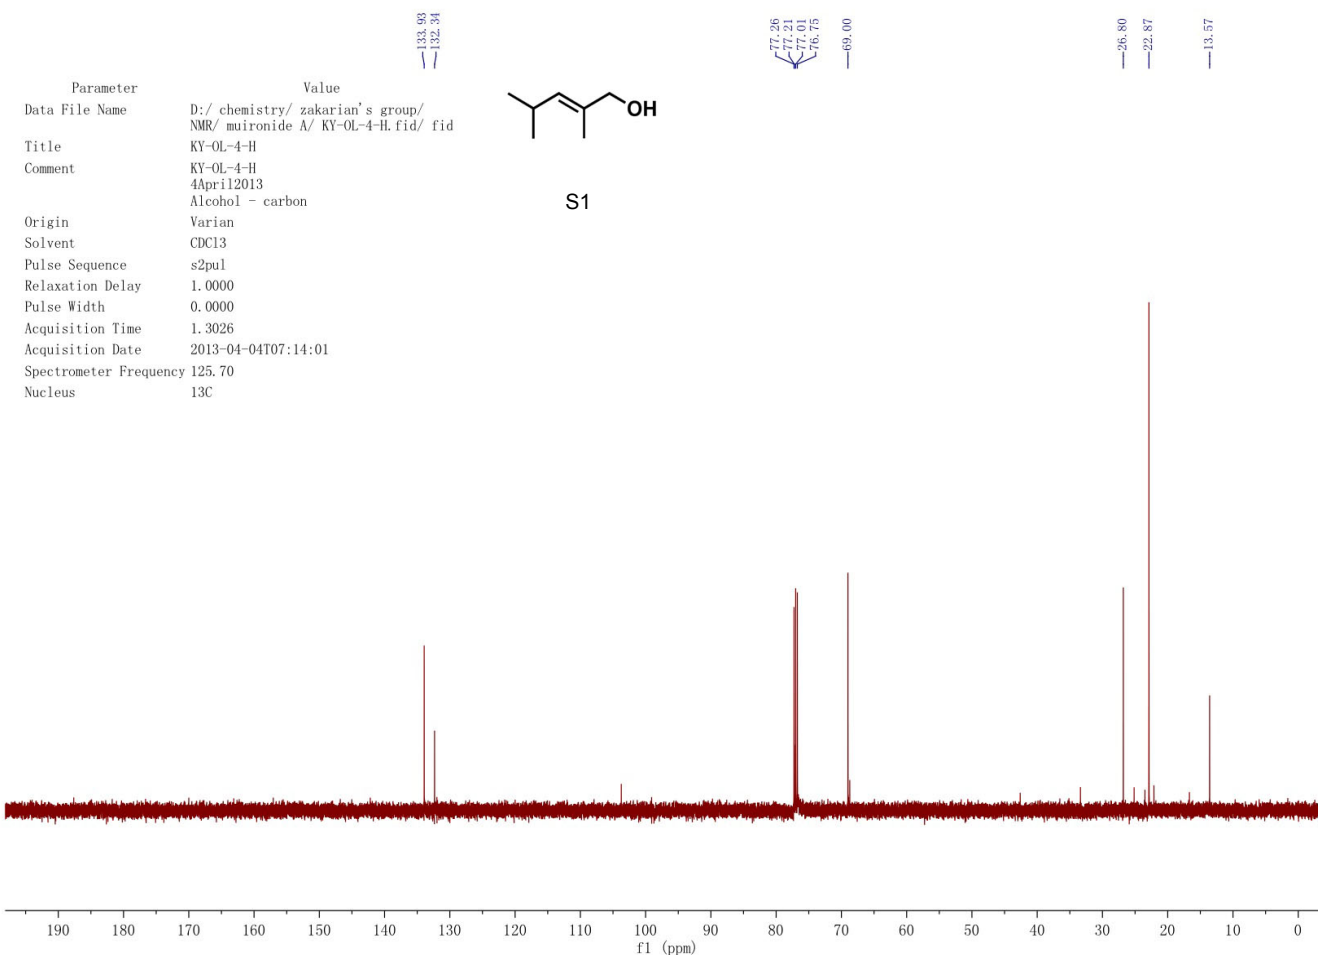

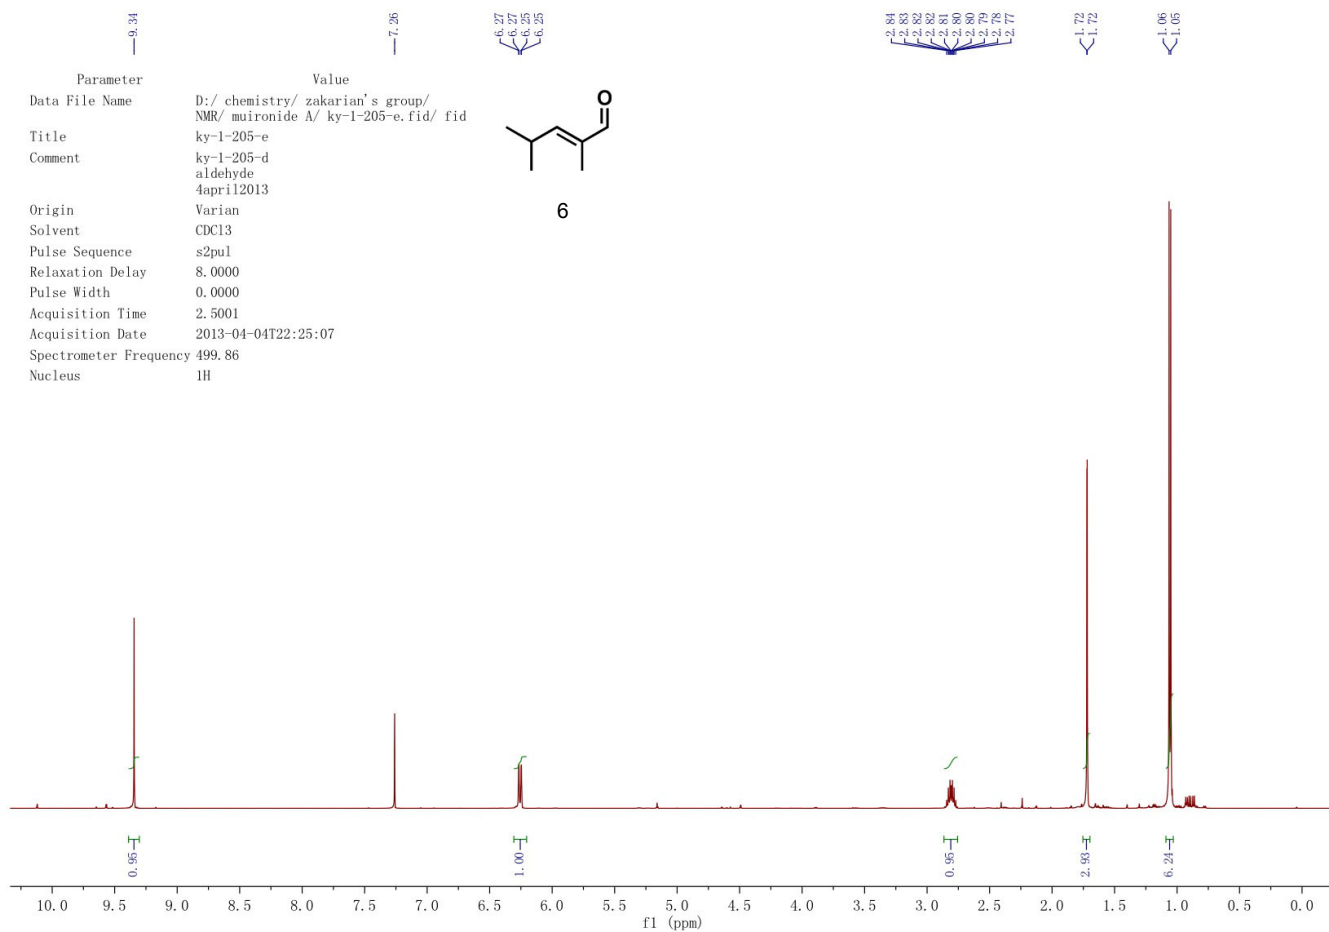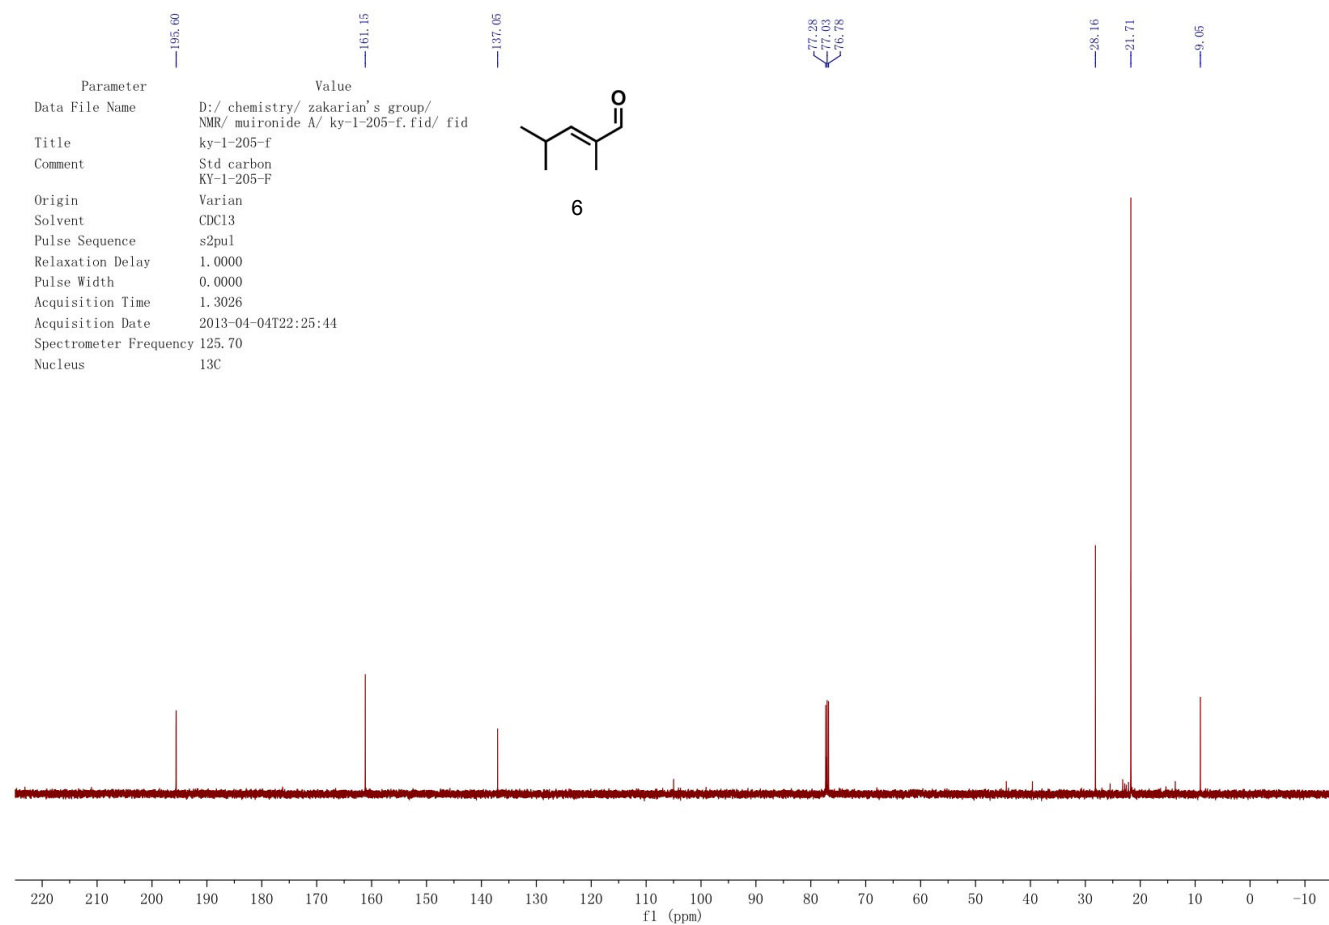



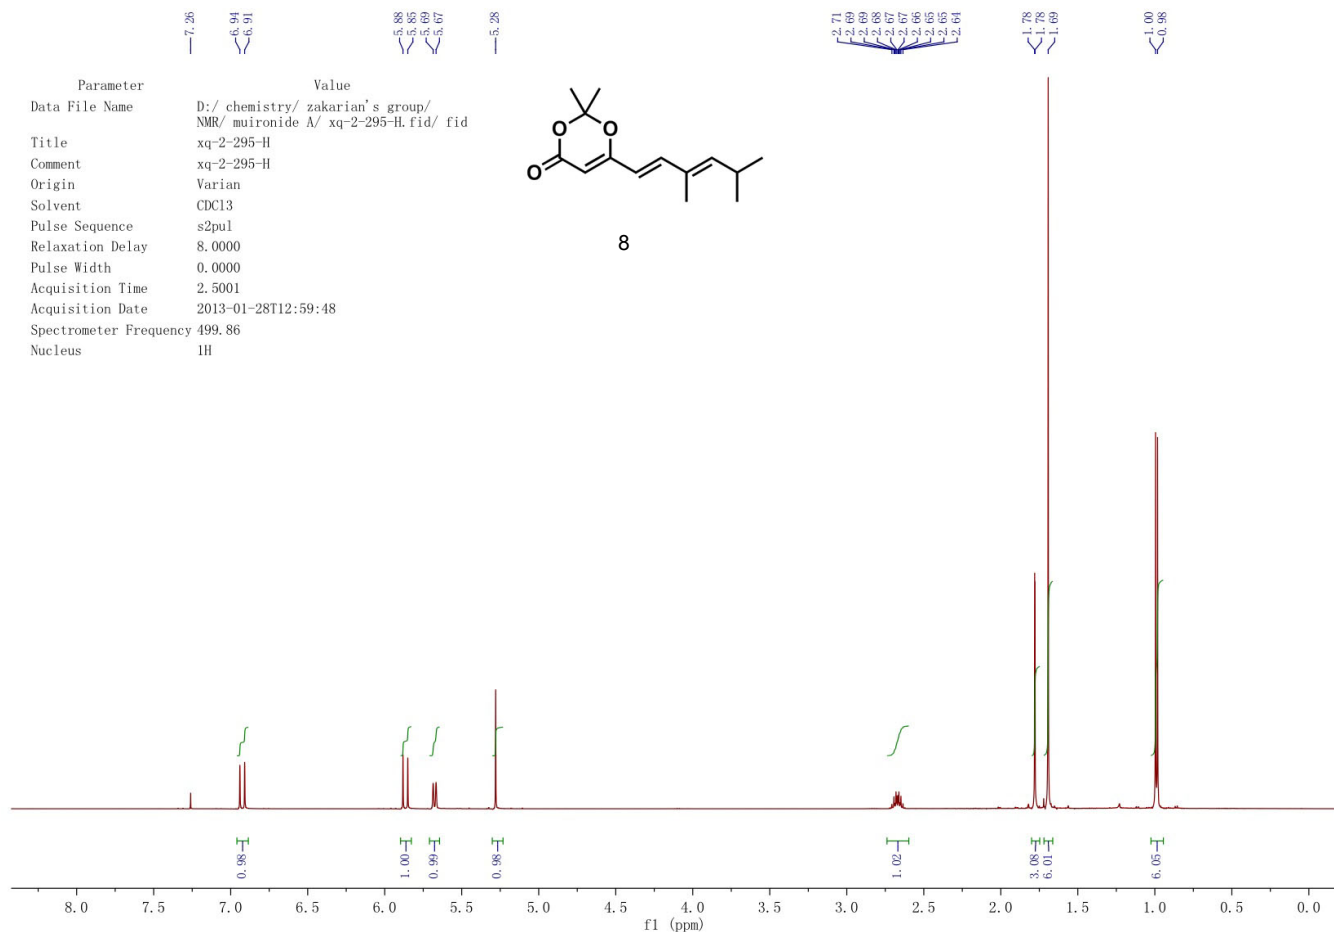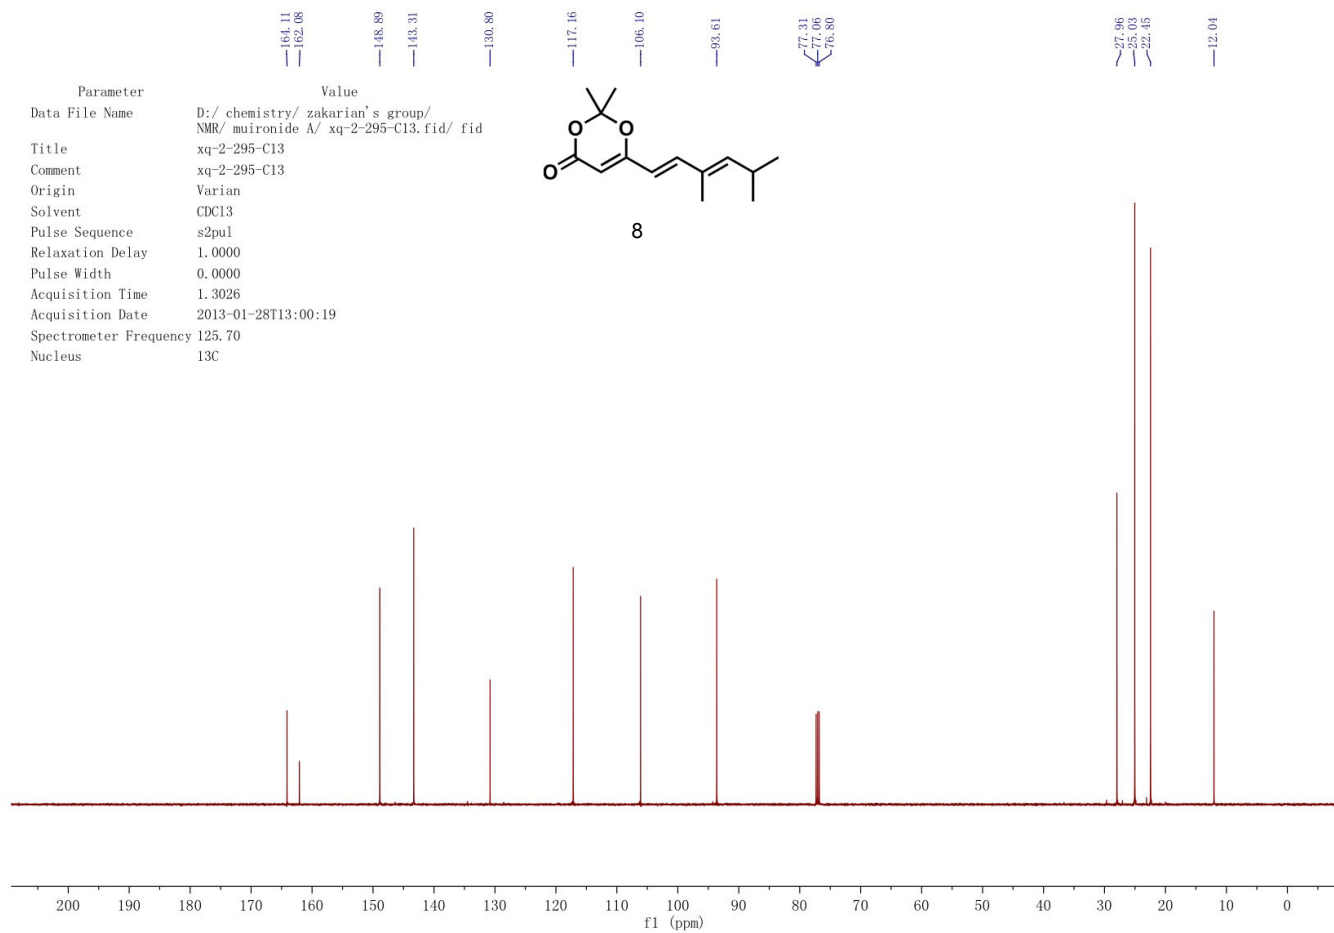

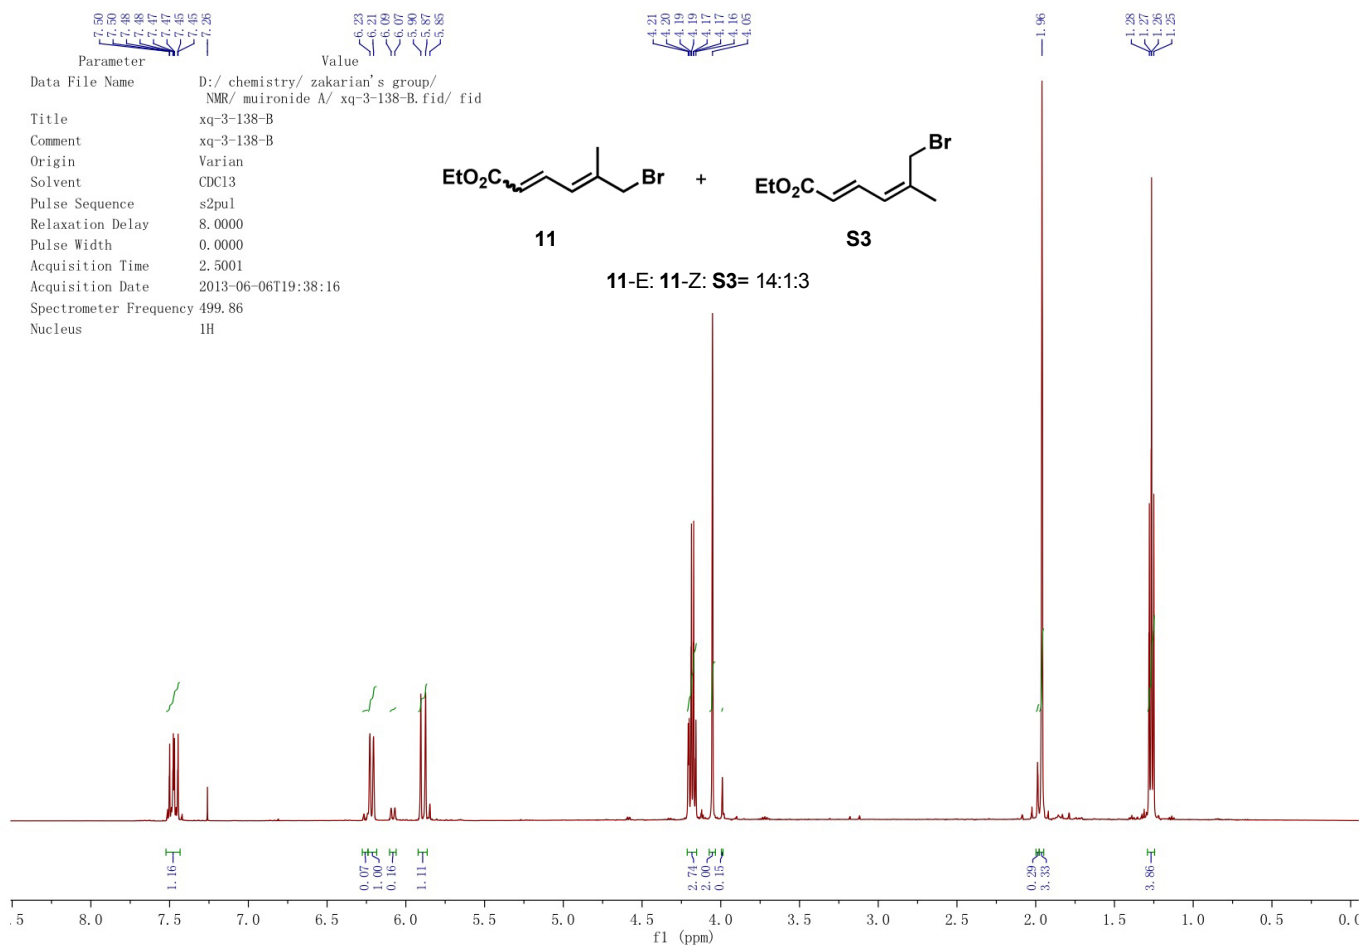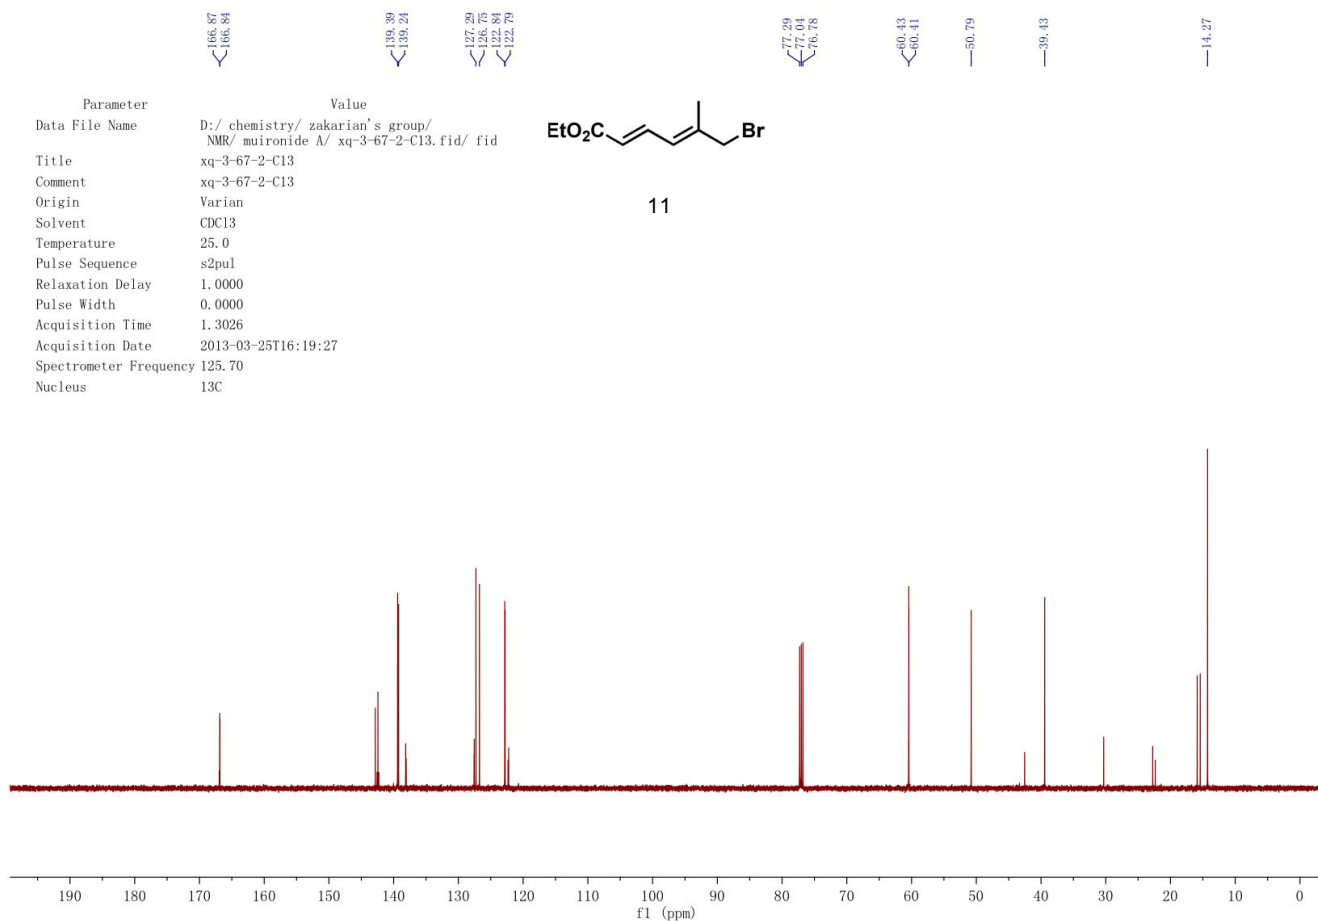

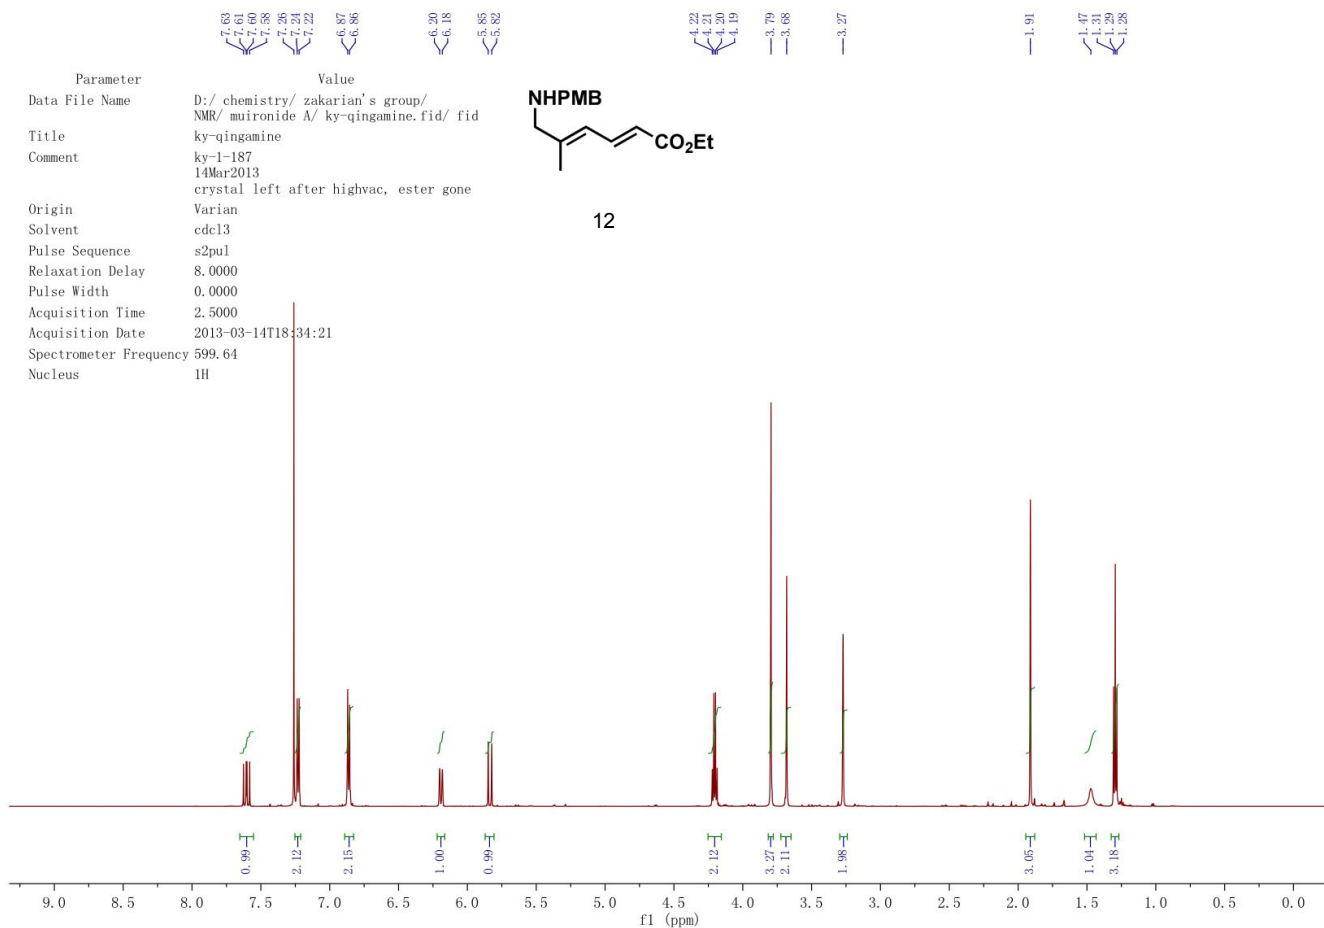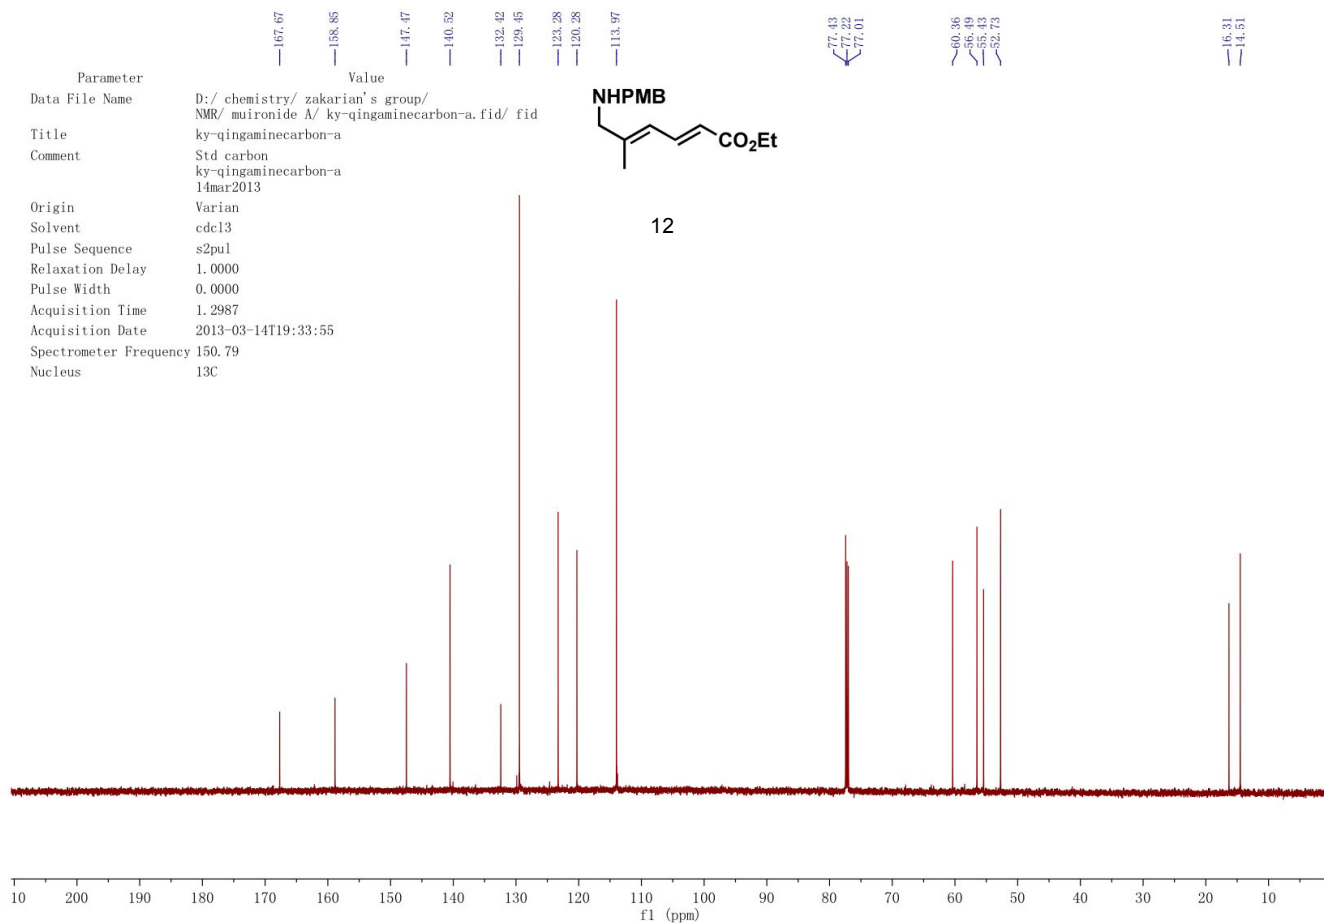

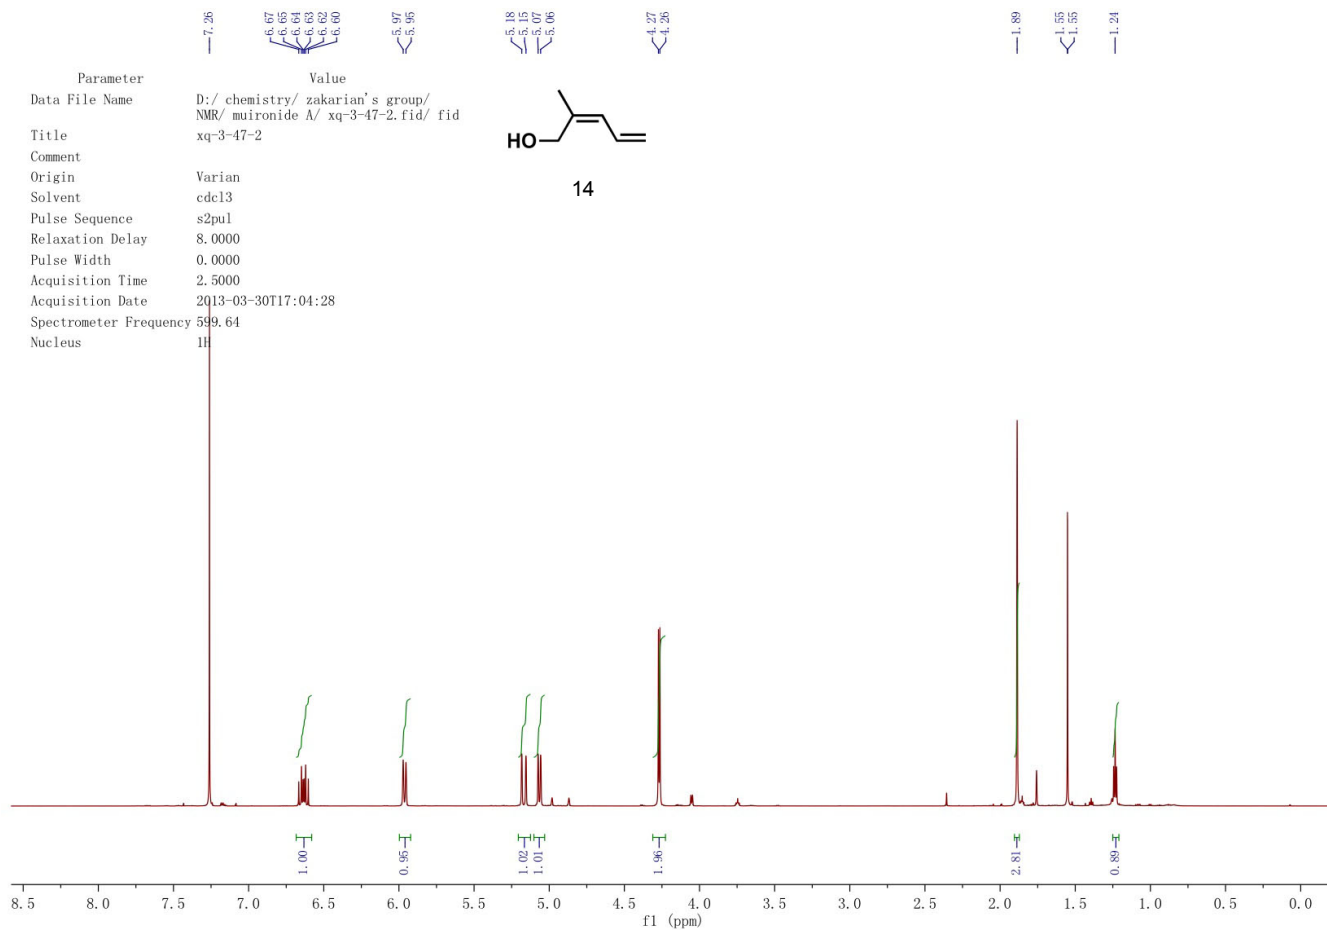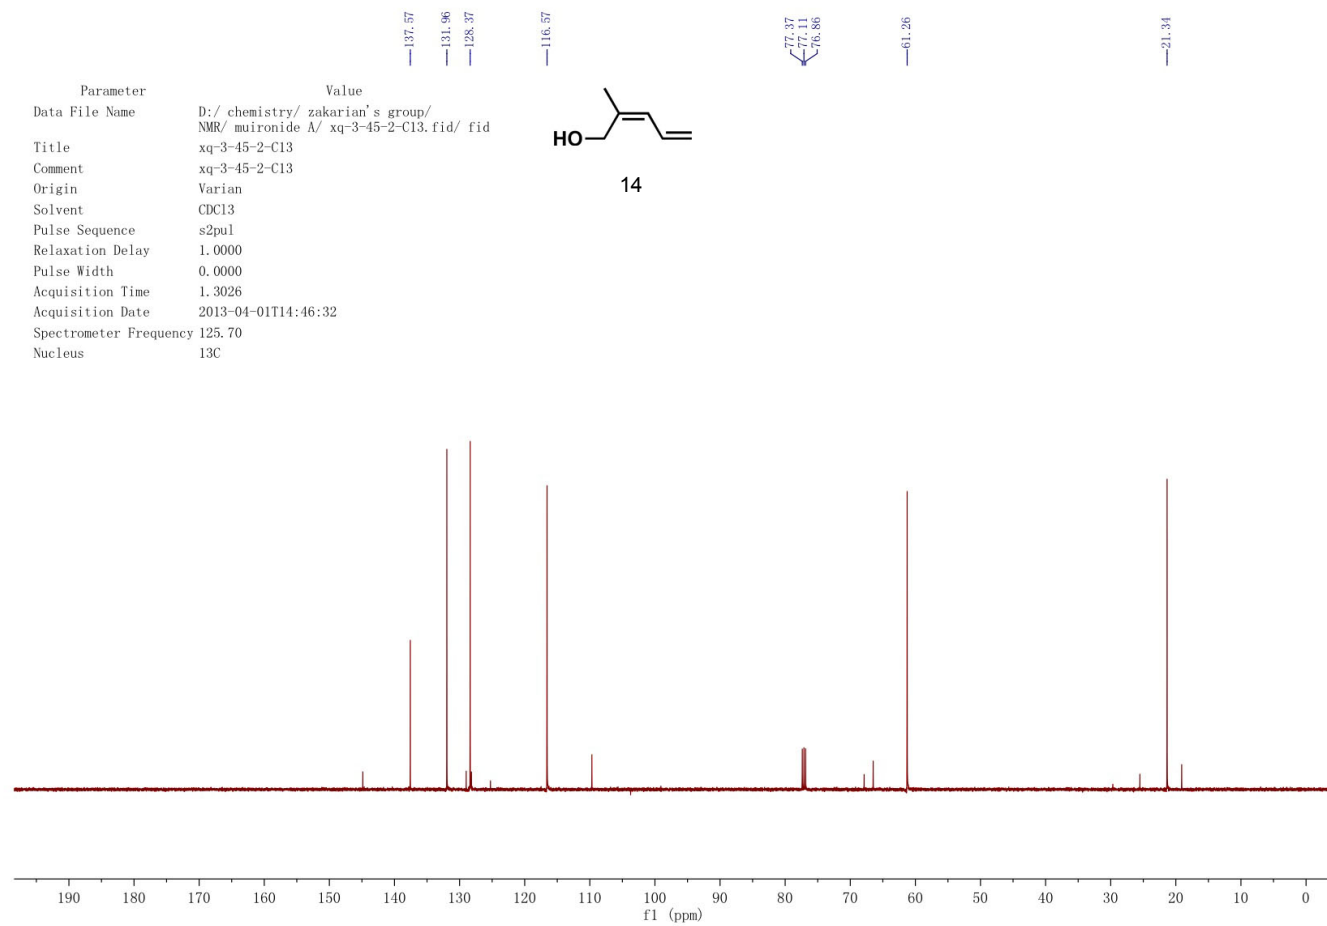

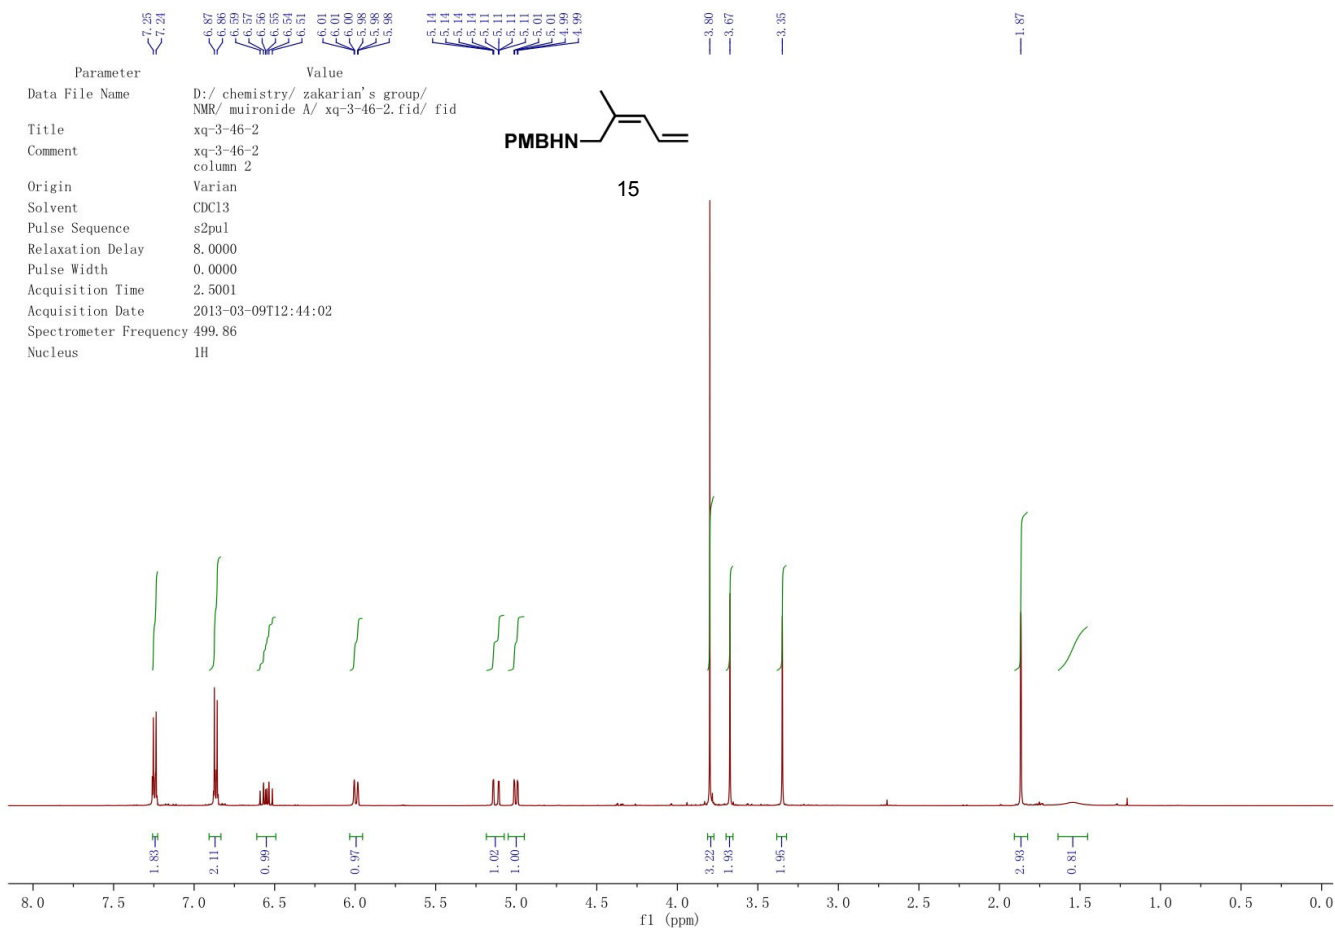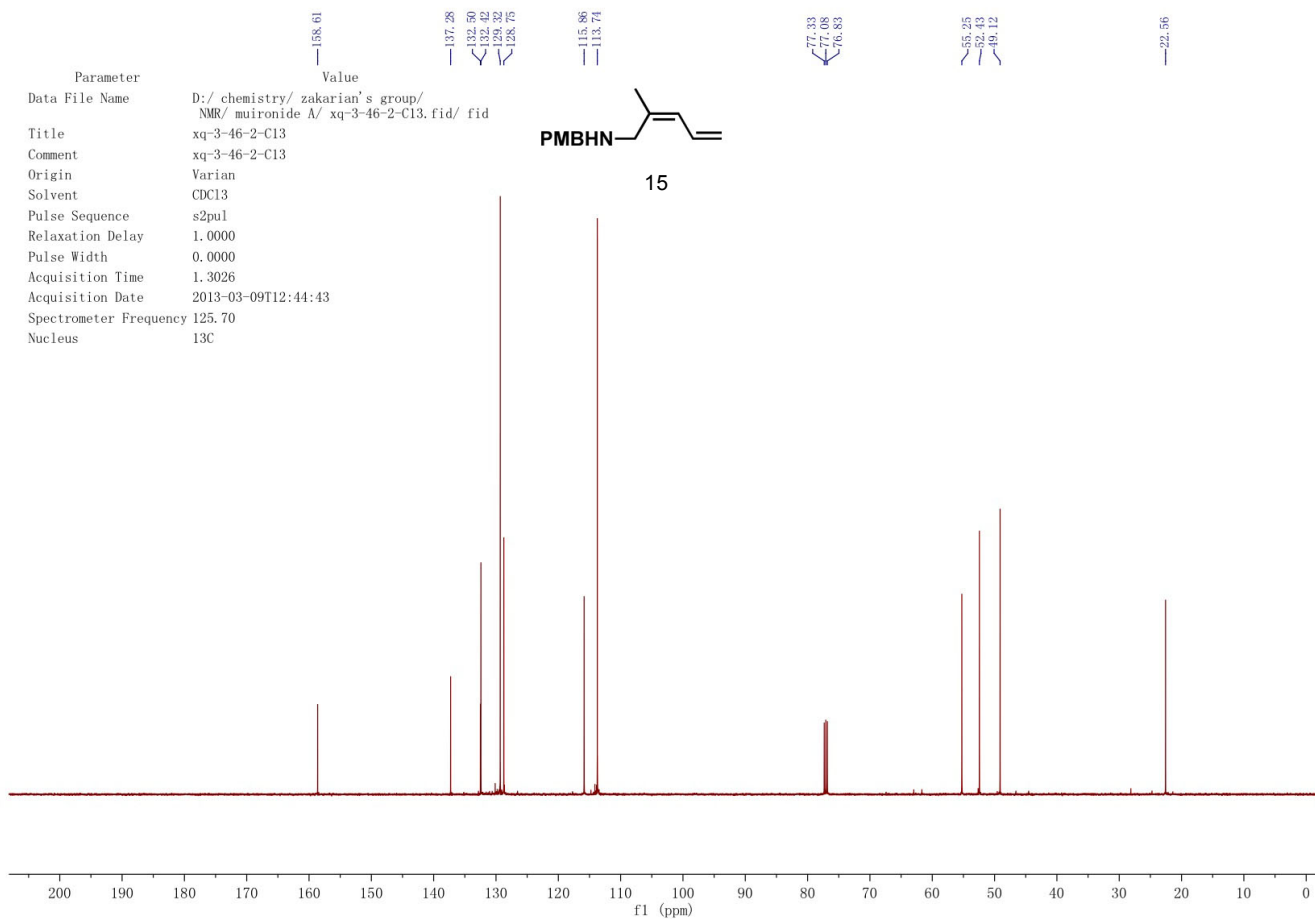

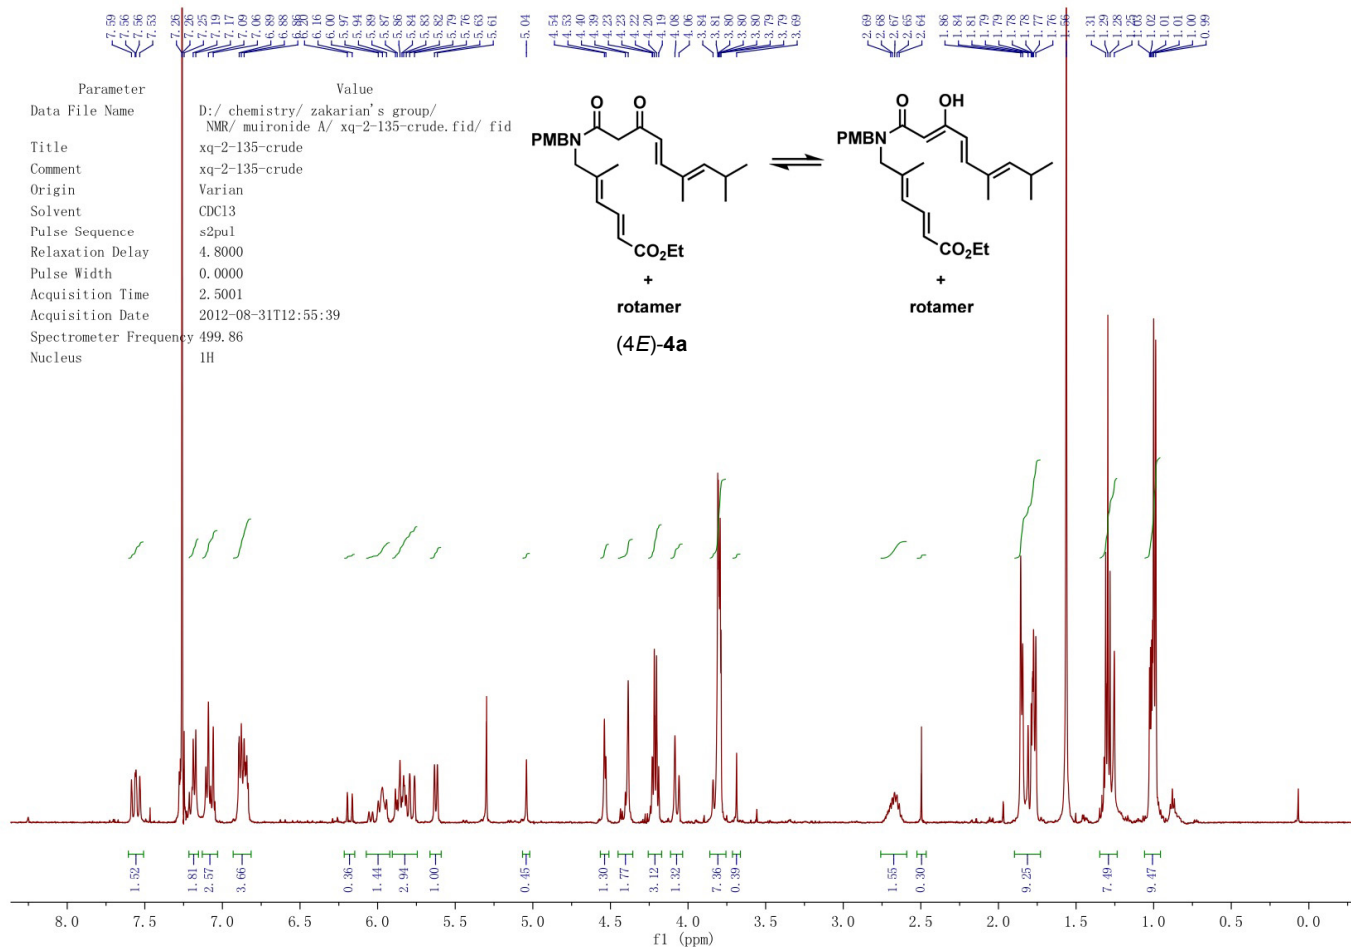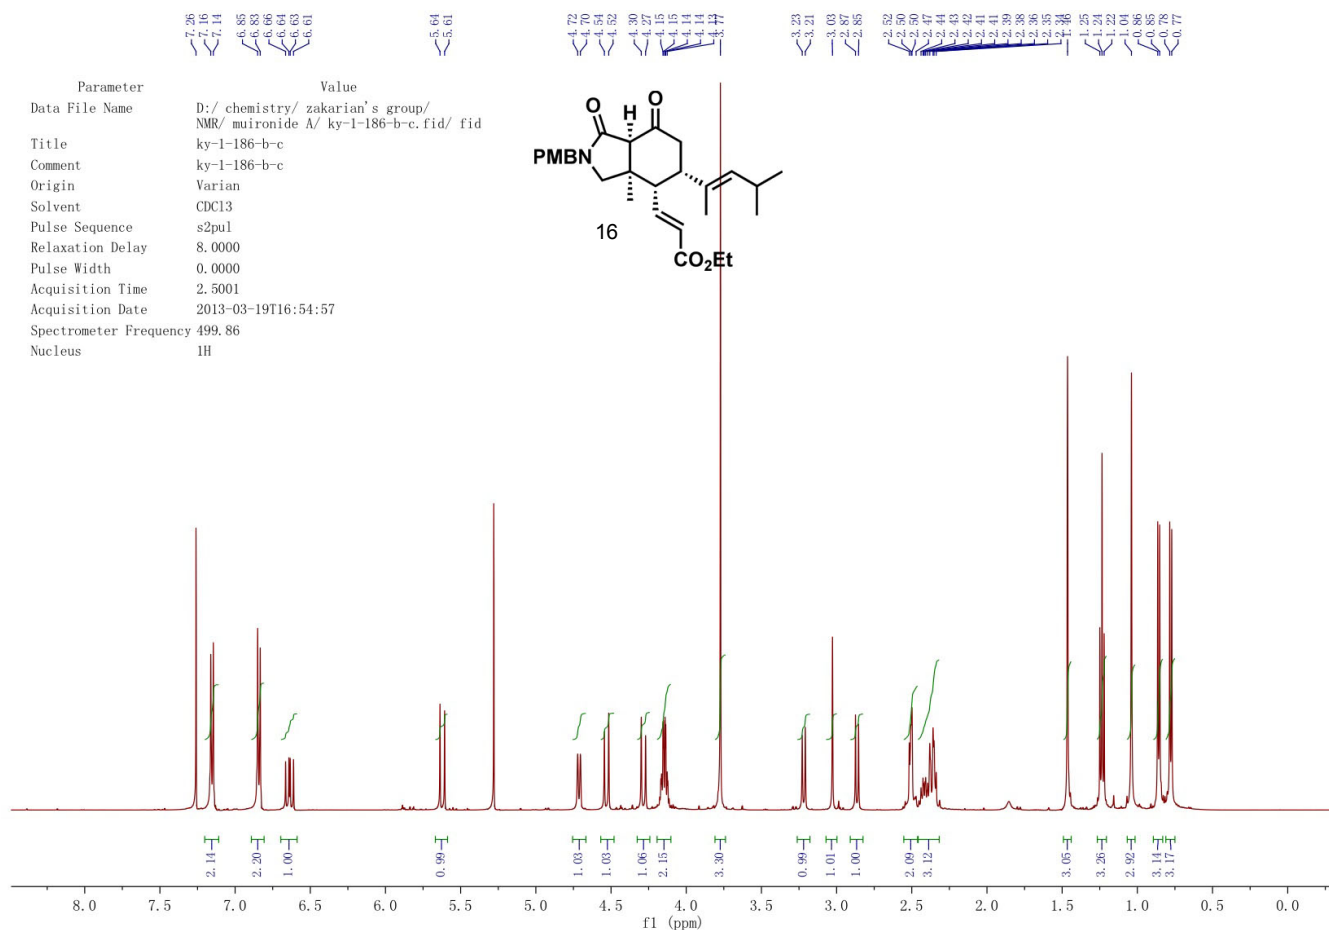

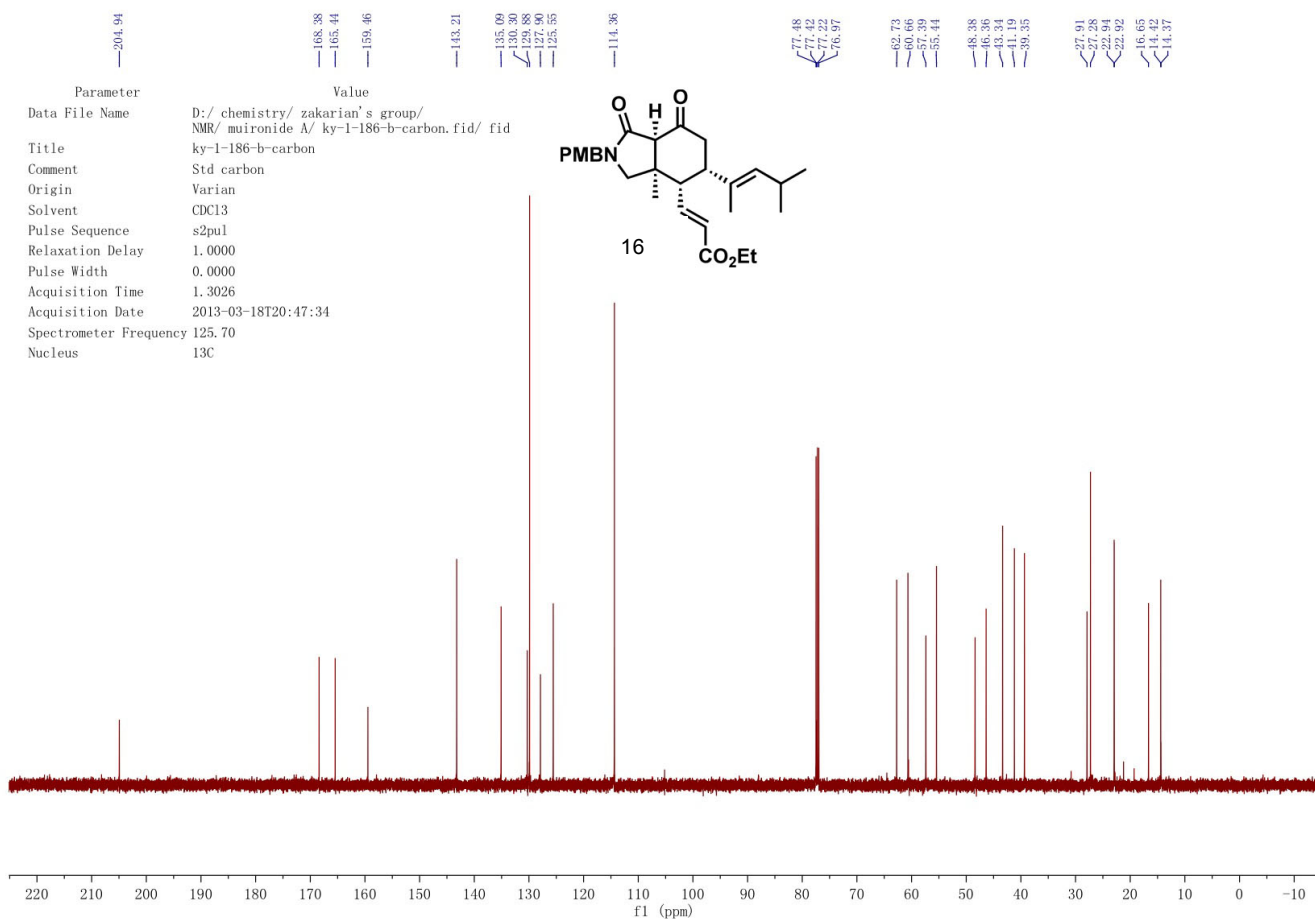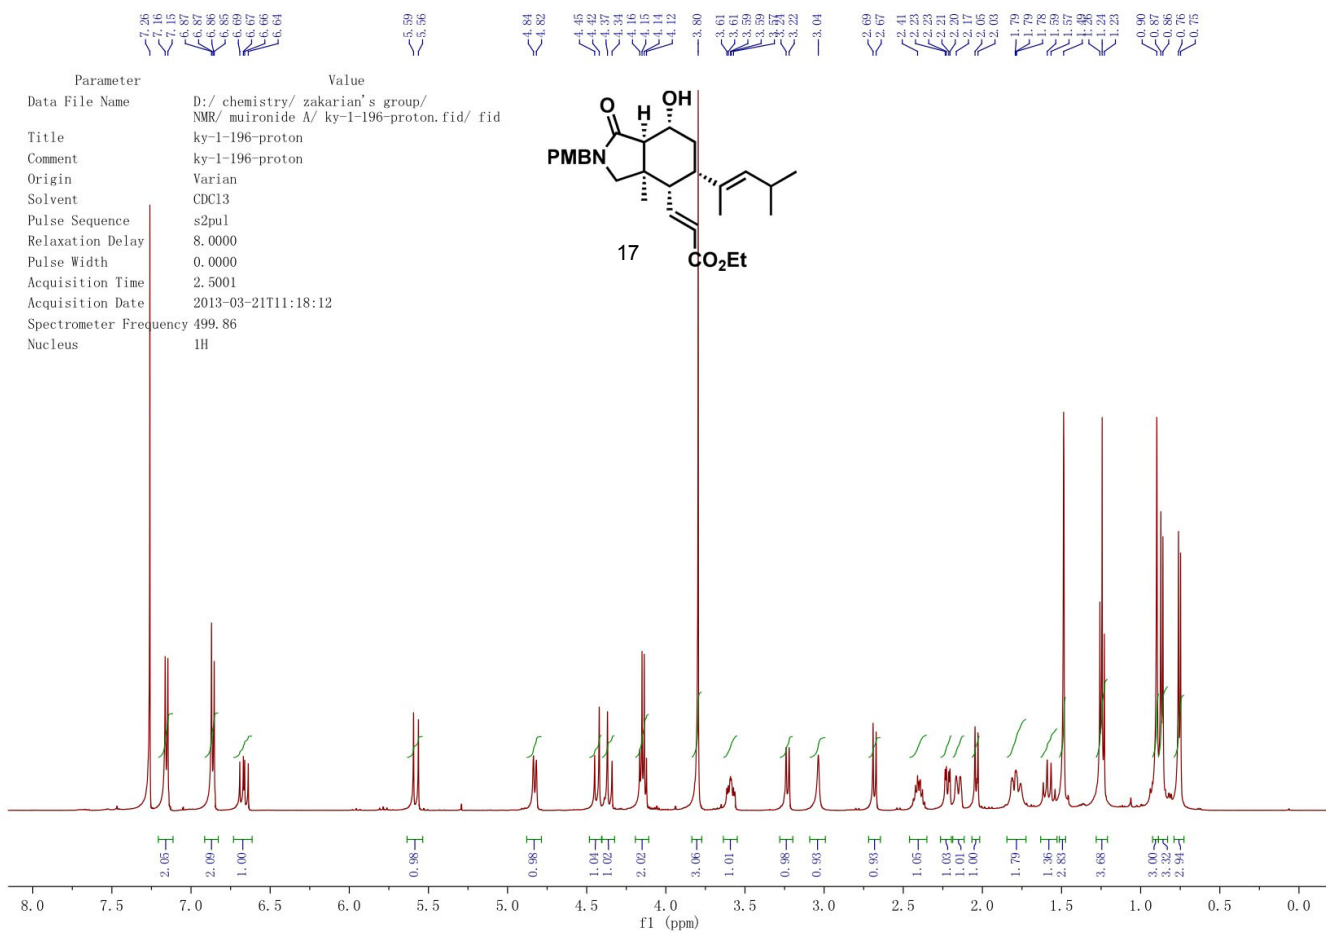

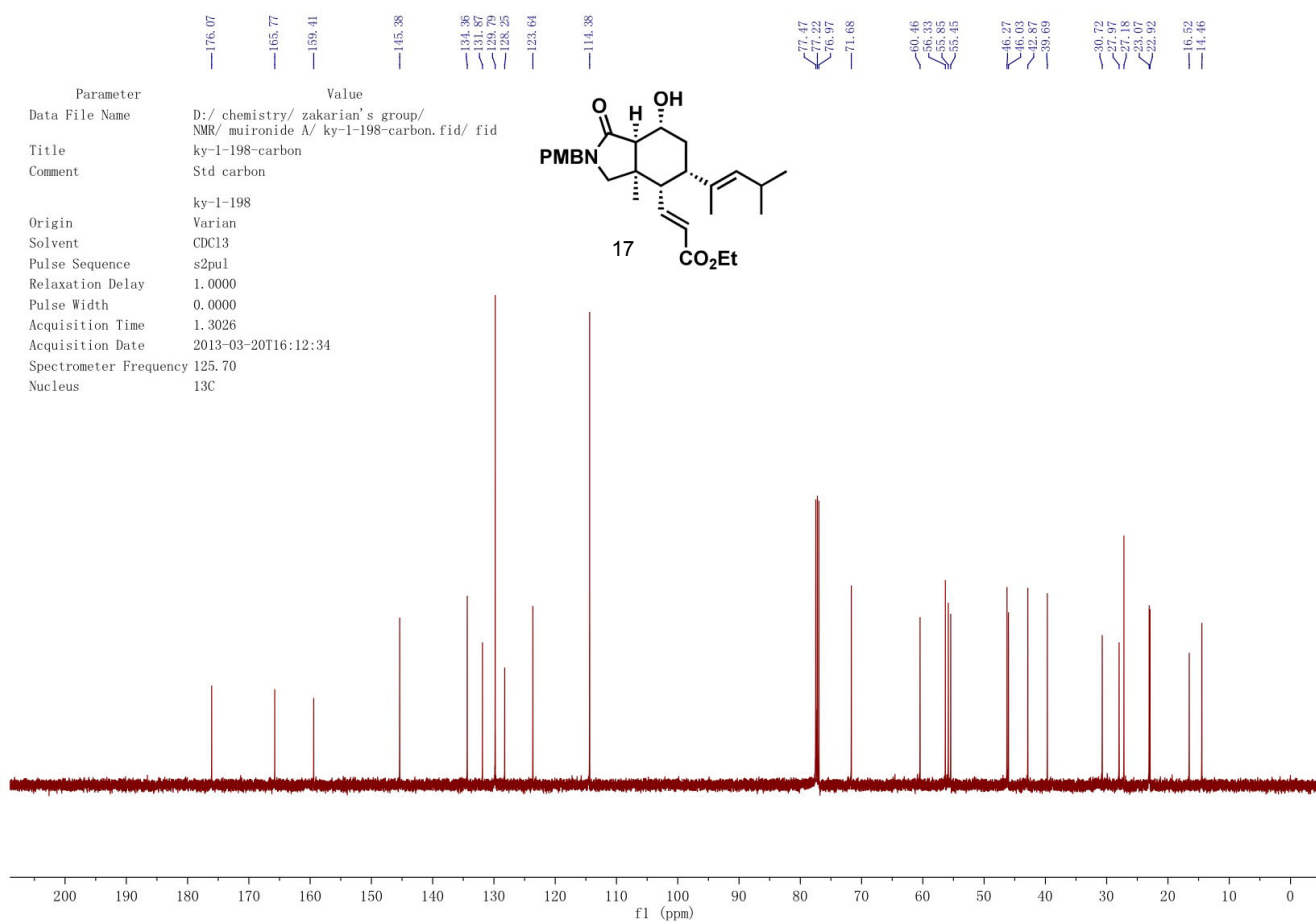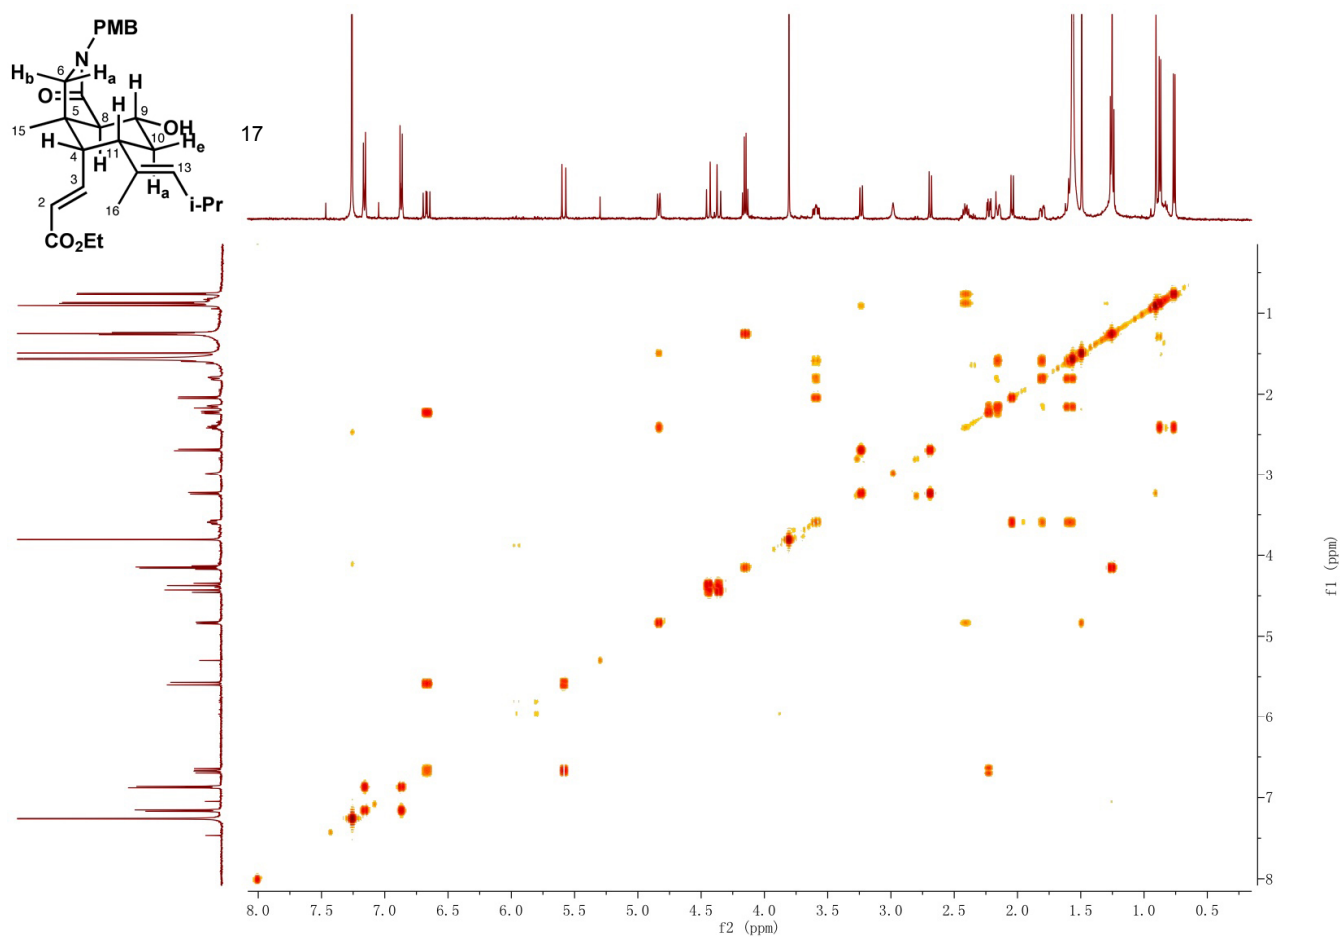2D H,H-COSY spectrum of **17** in CDCl<sub>3</sub>(600 MHz)



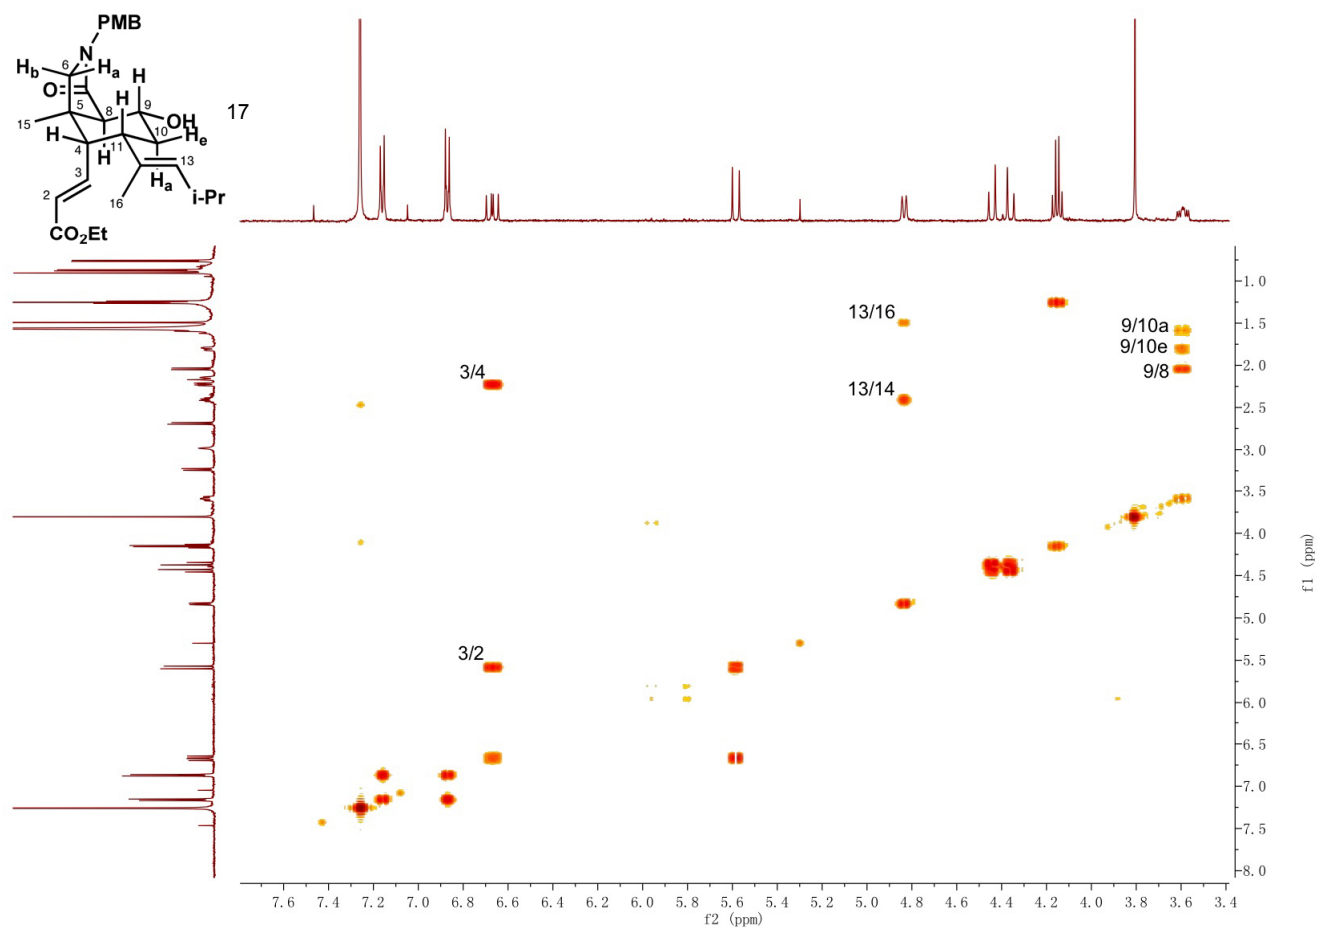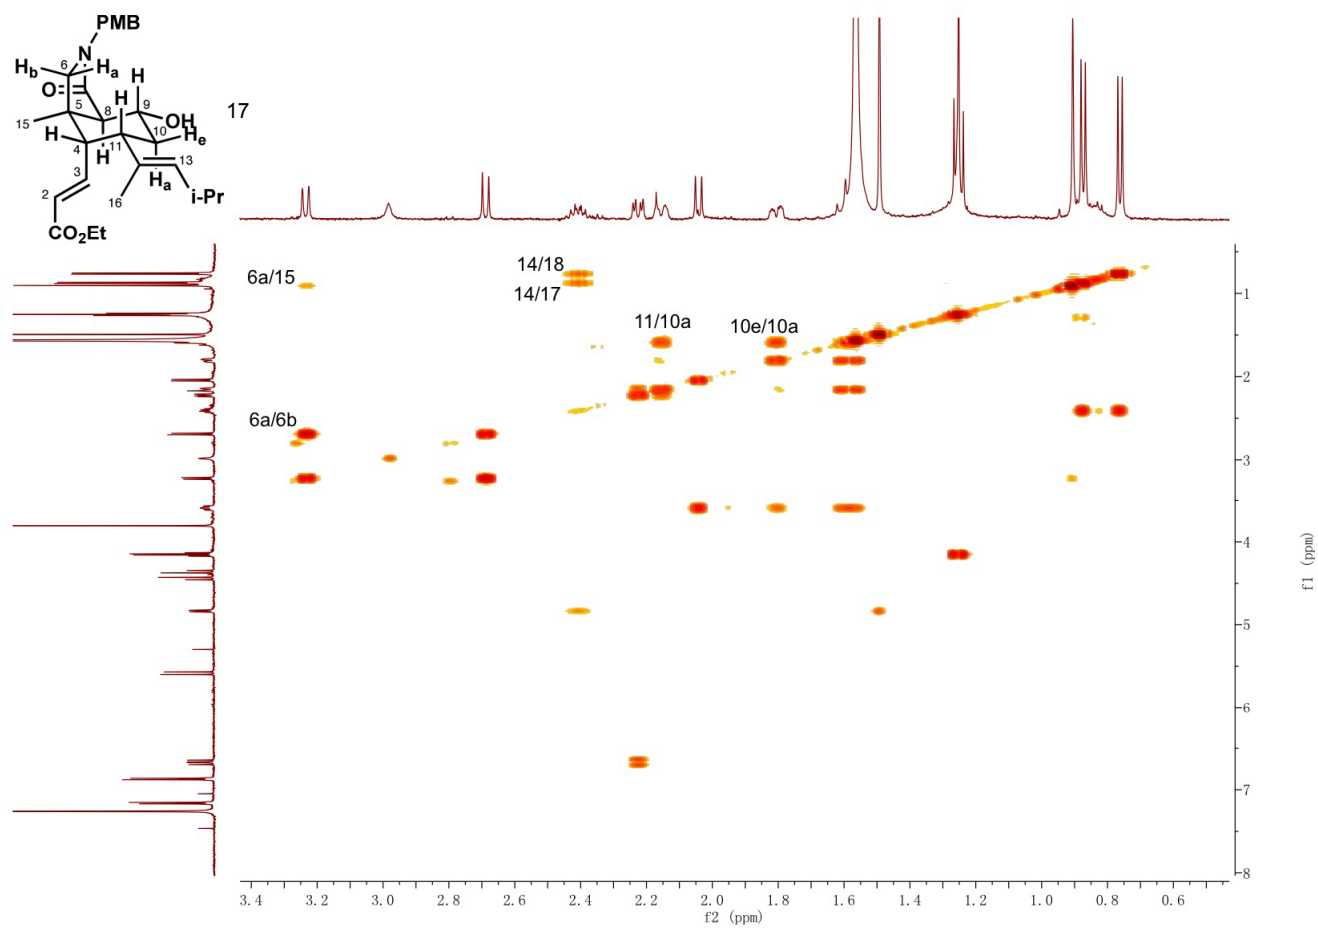Enlarged 2D H,H-COSY spectrum of **17** in CDCl<sub>3</sub>(600 MHz)

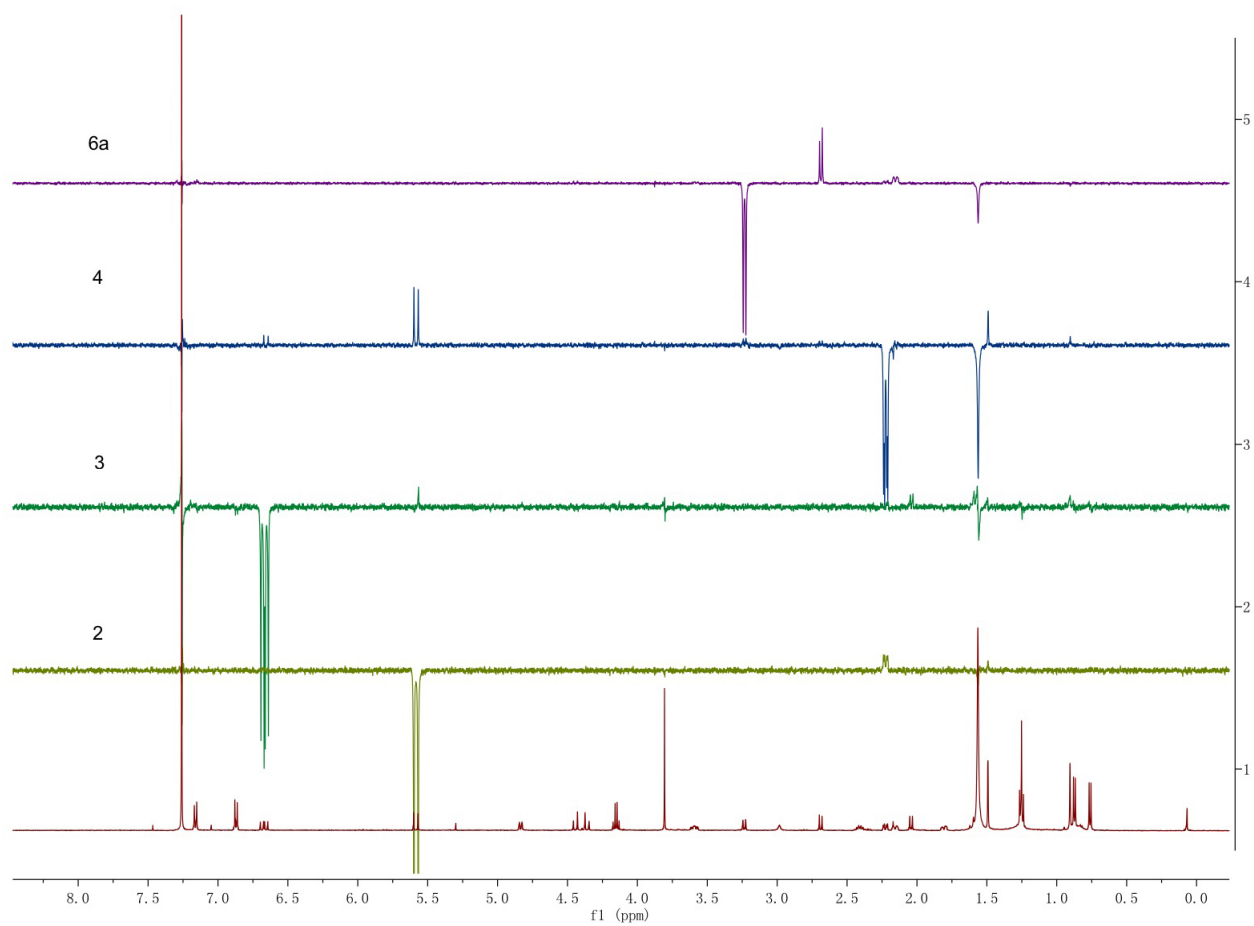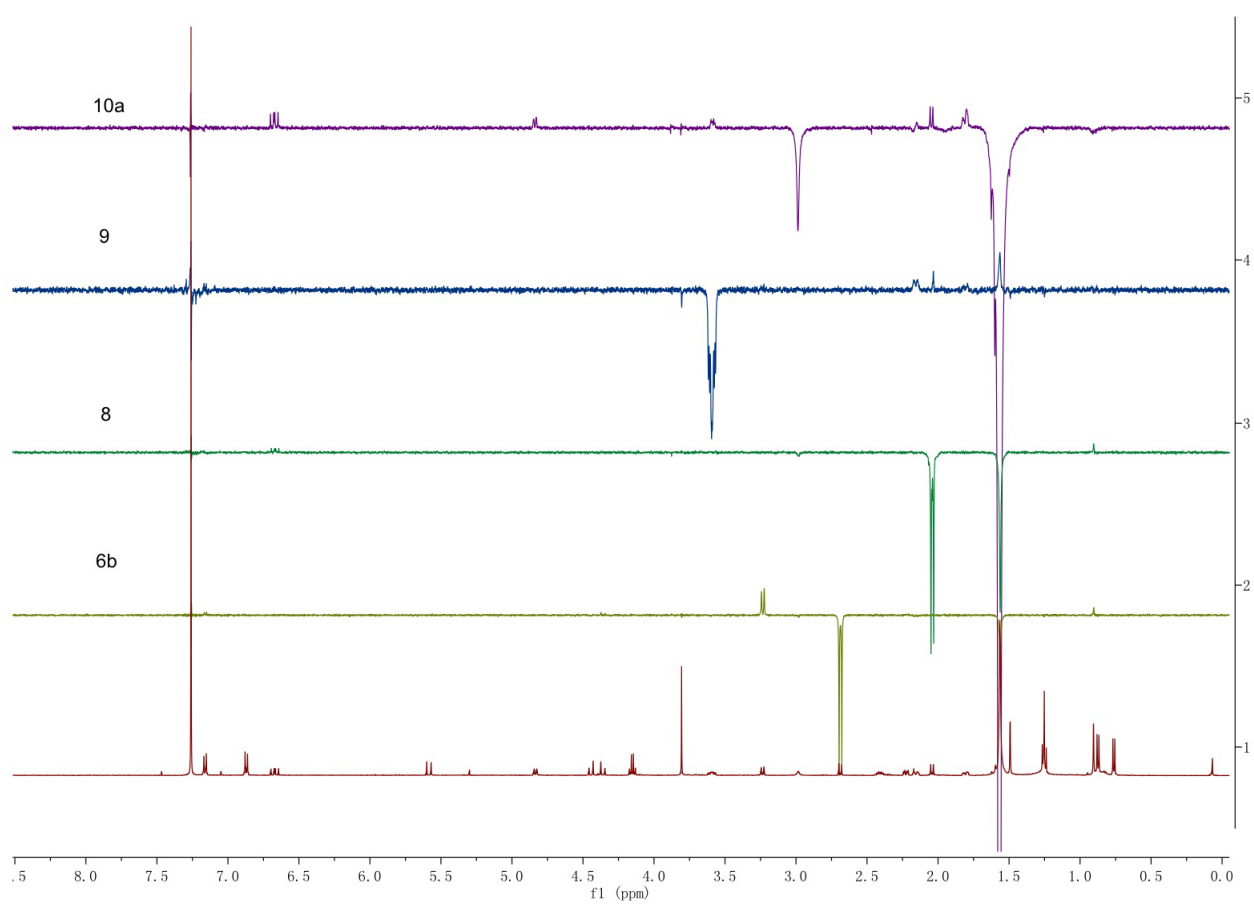NOE spectrum of **17** in  $\text{CDCl}_3$  (500 MHz)

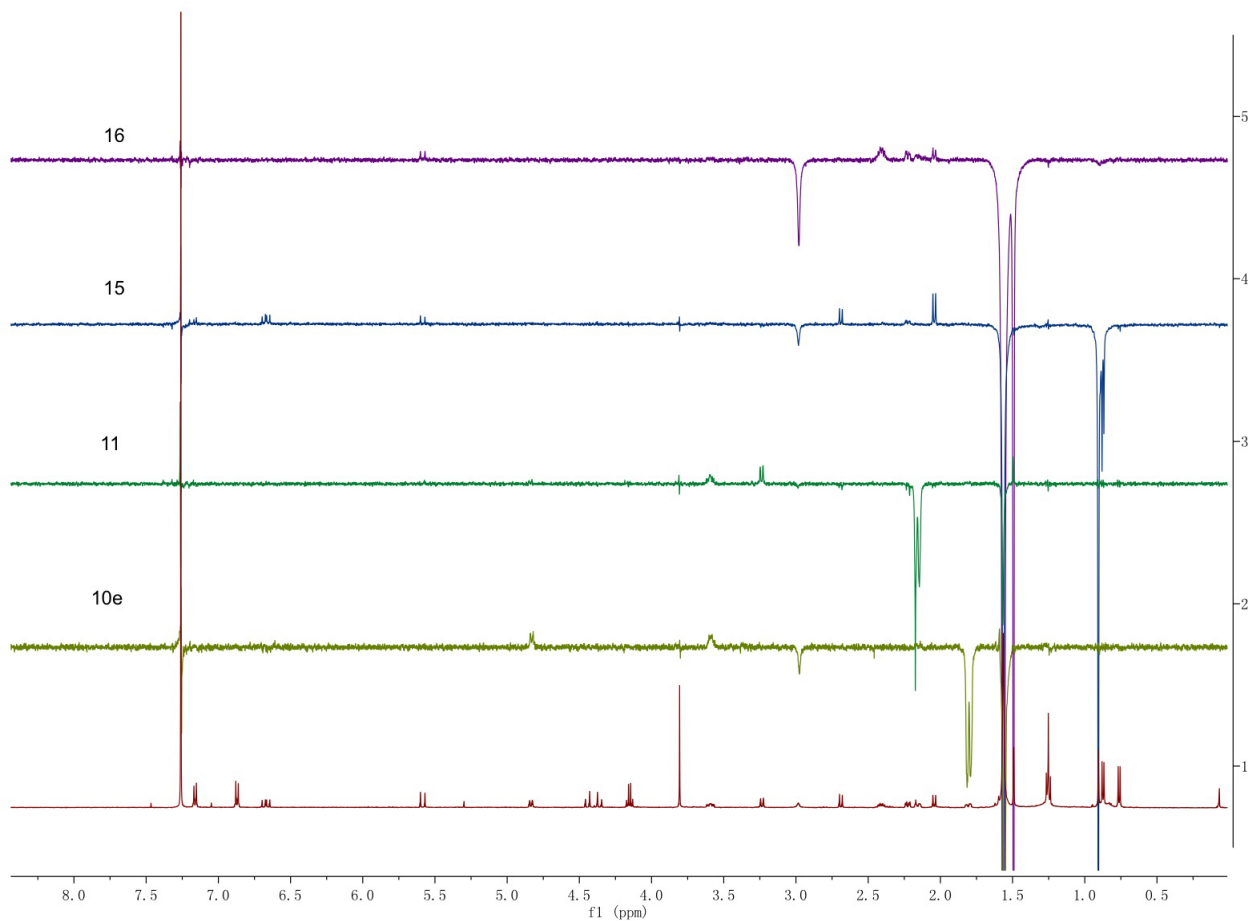NOE spectrum of 17 in CDCl<sub>3</sub> (500 MHz)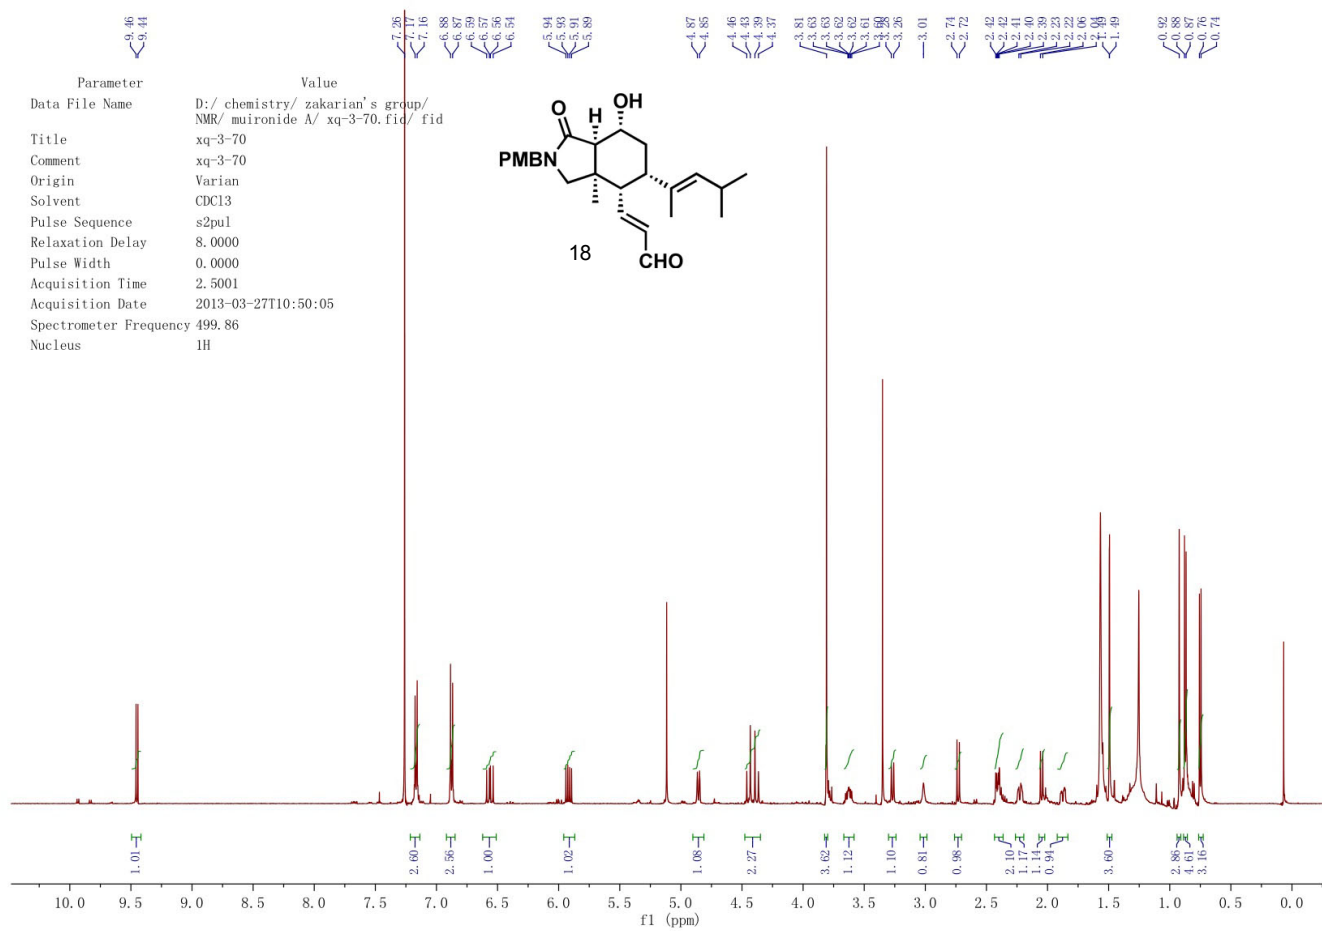

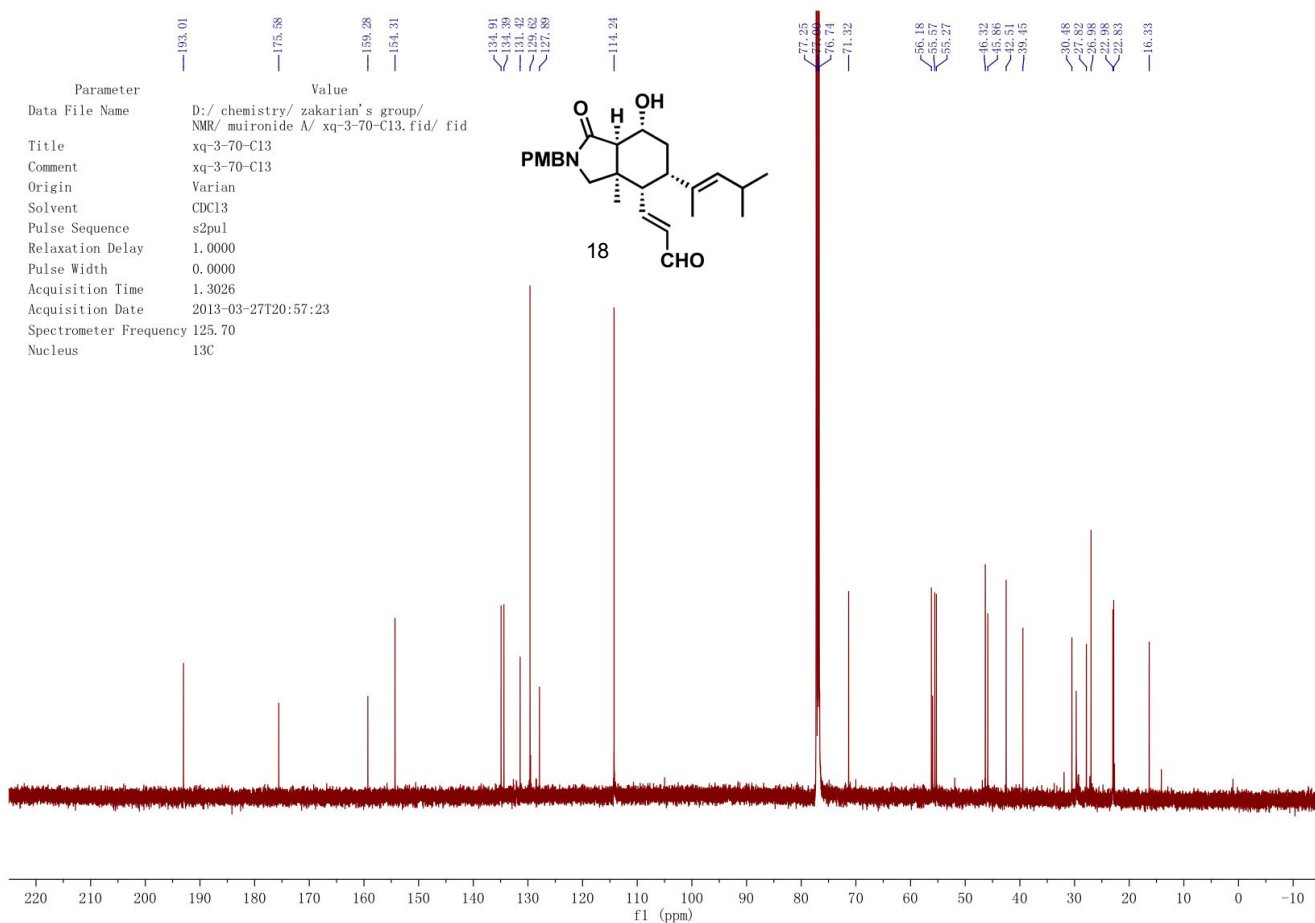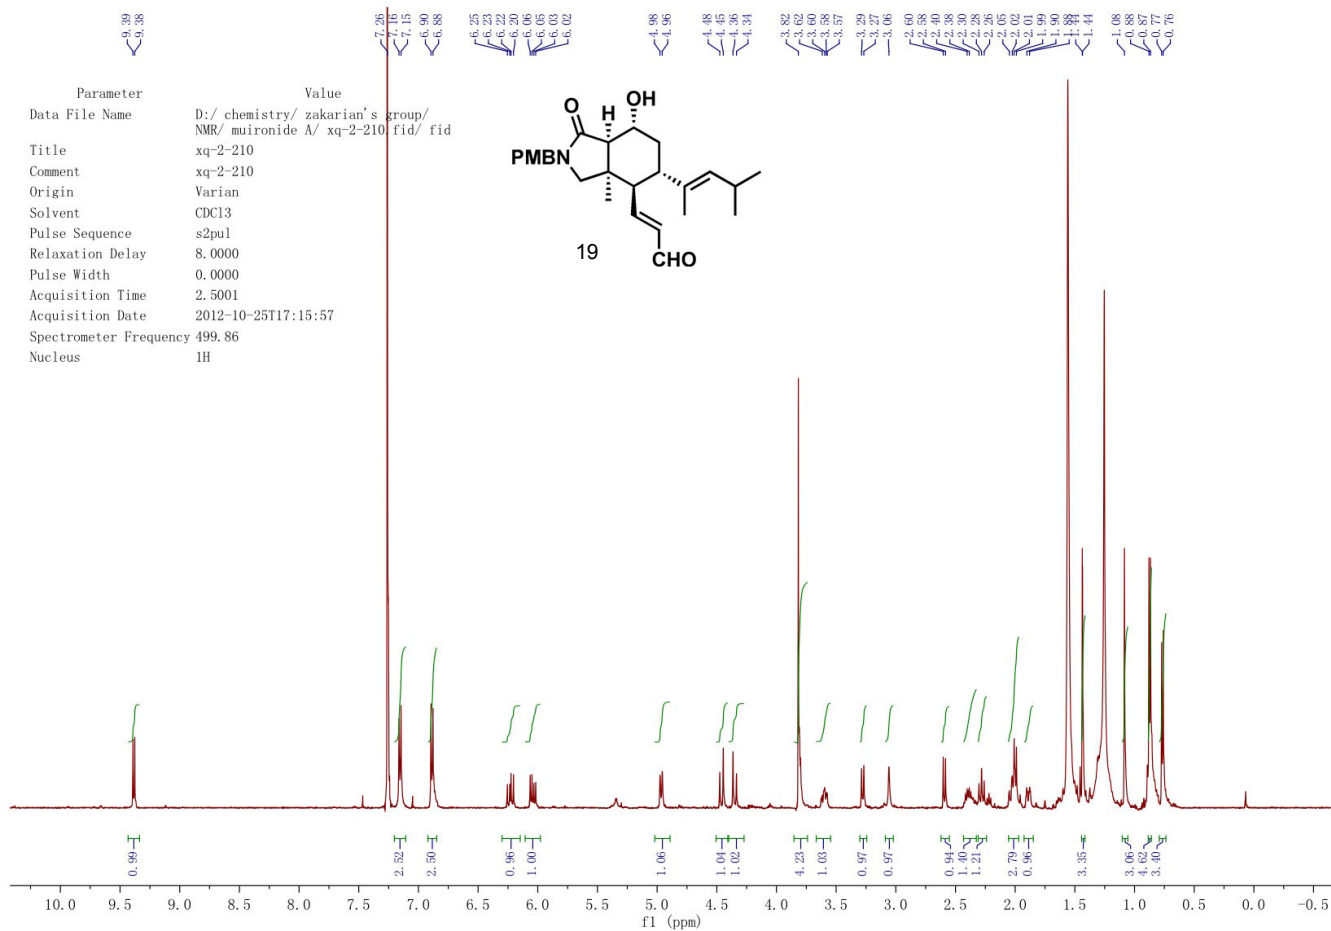

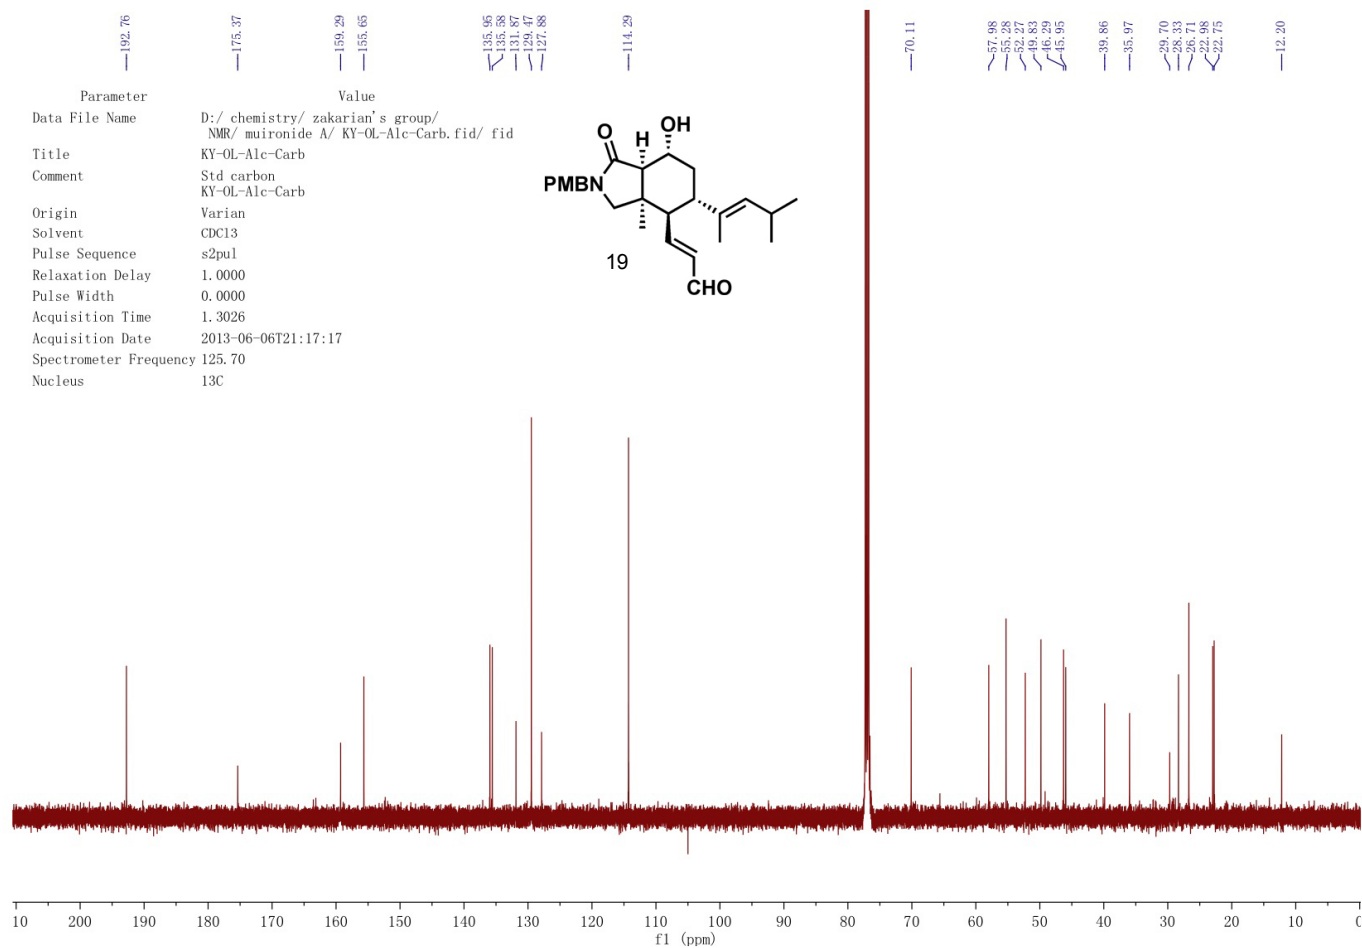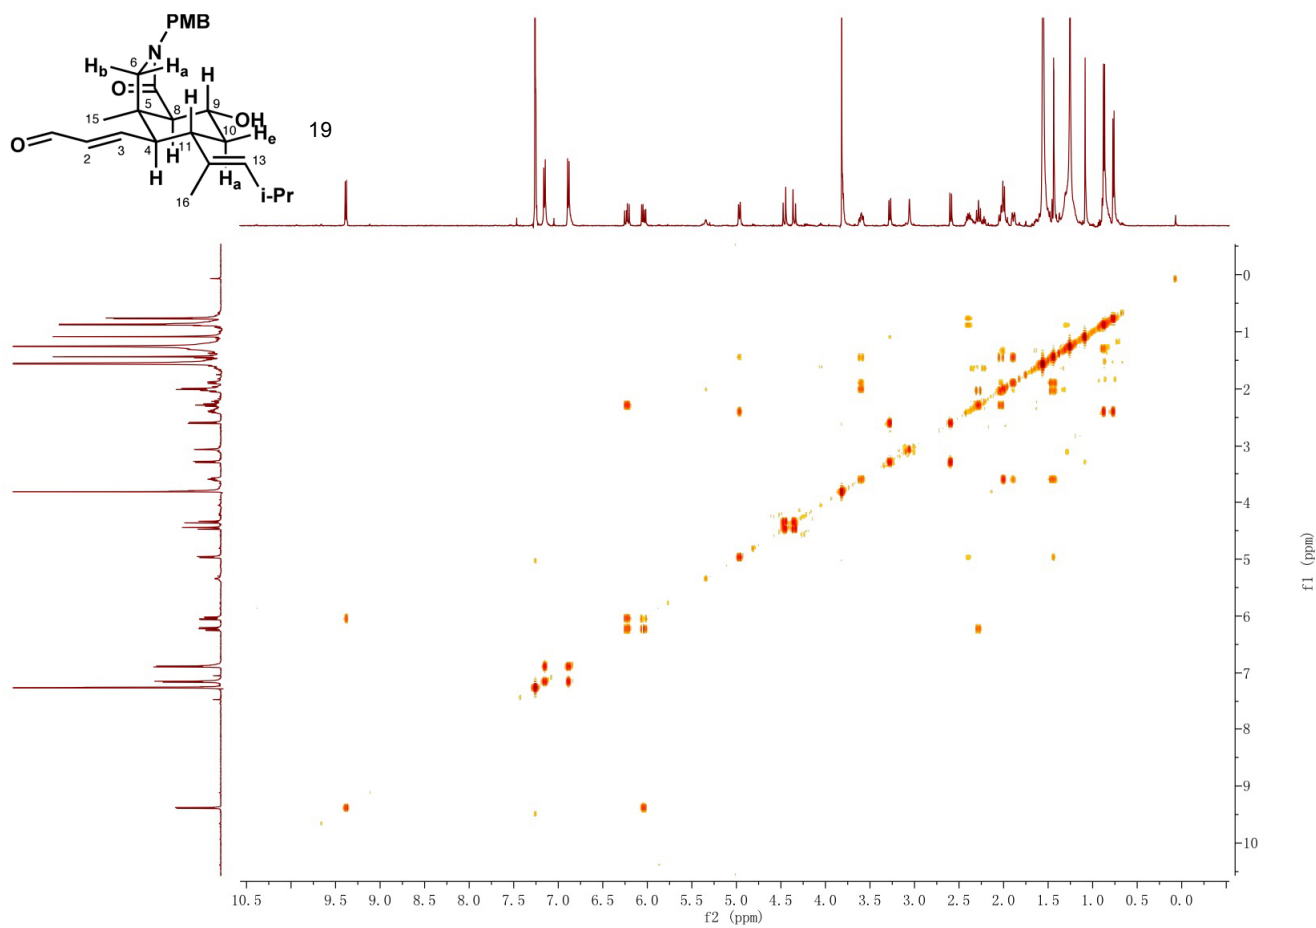2D H,H-COSY spectrum of **19** in CDCl<sub>3</sub>(600 MHz)

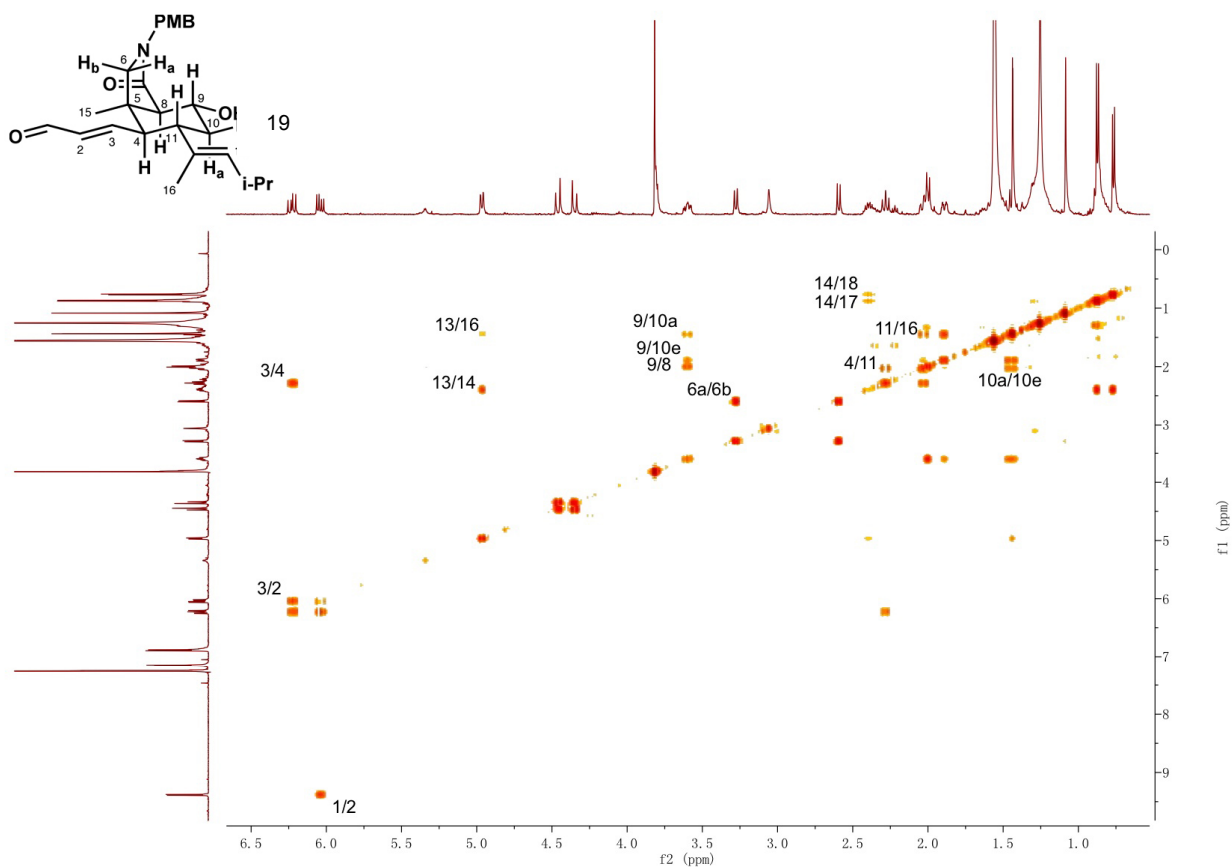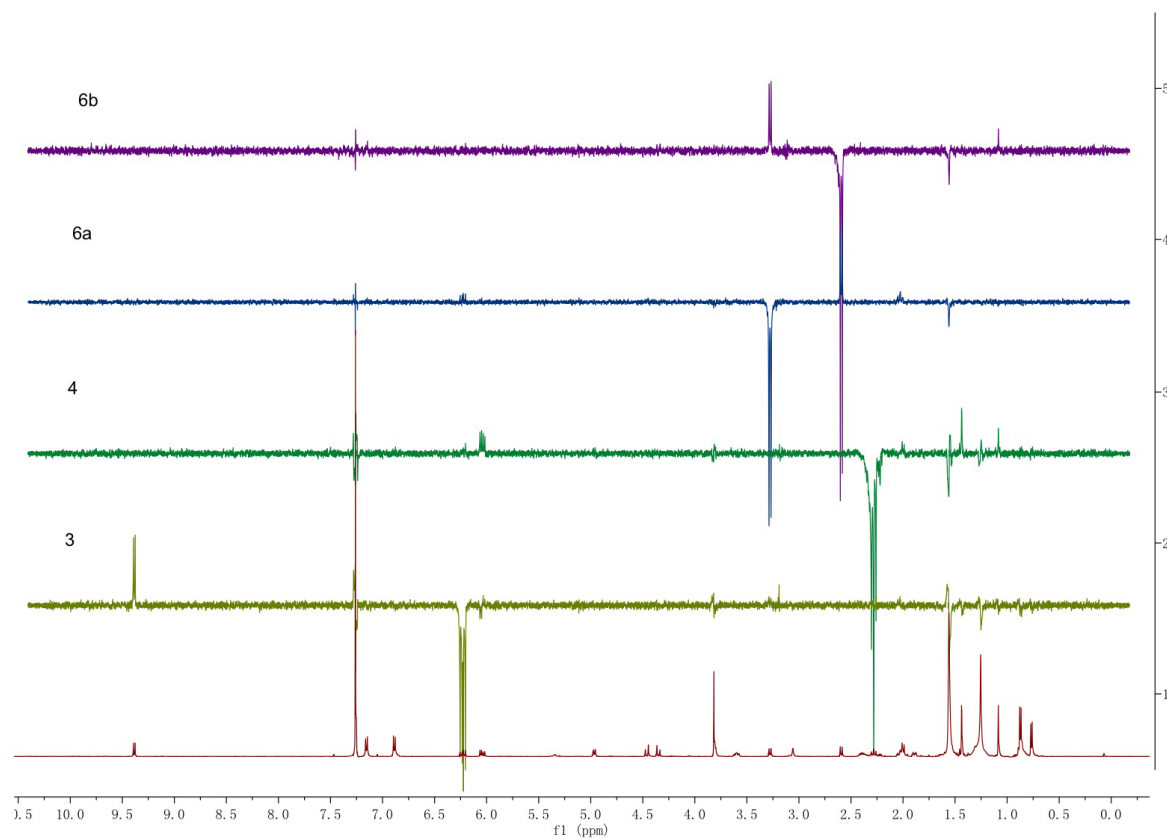

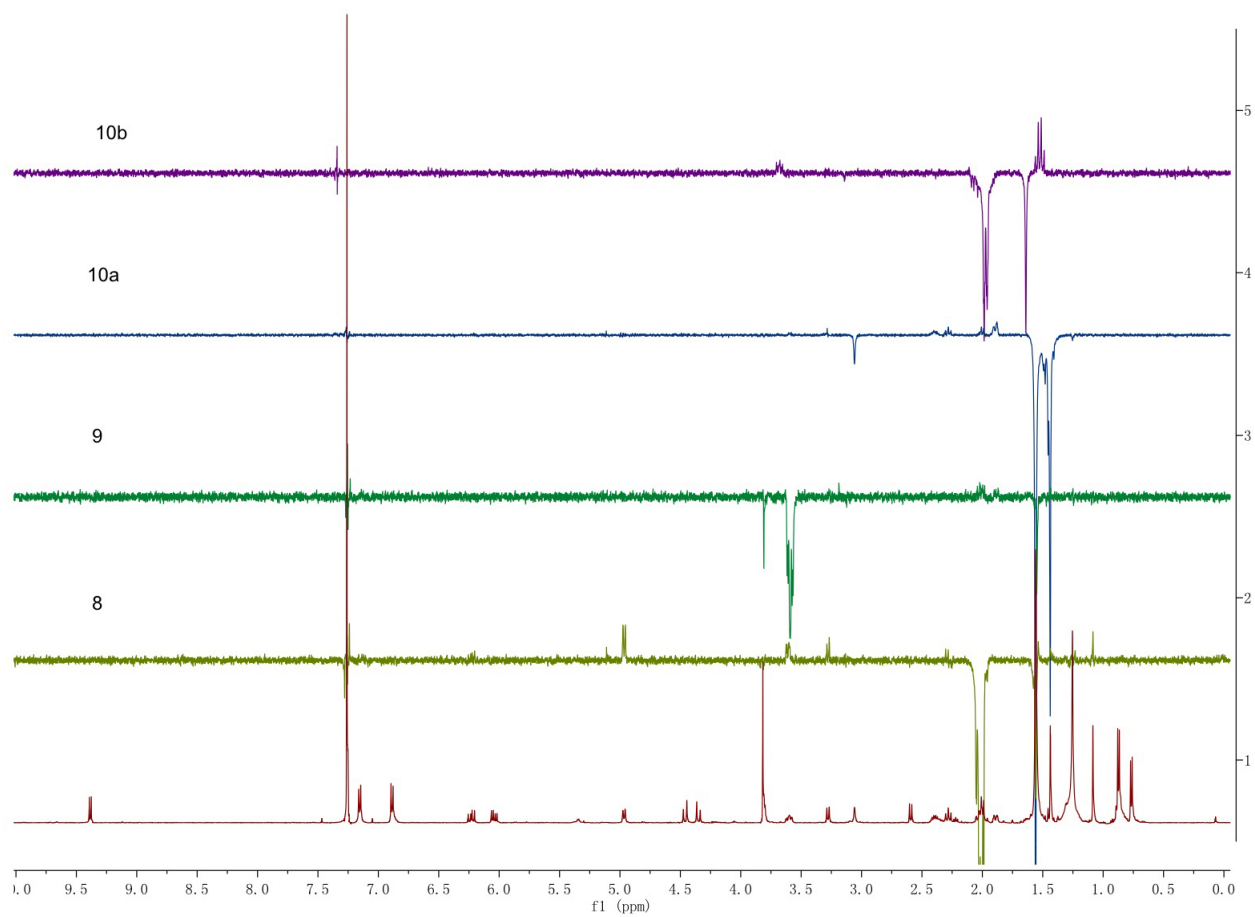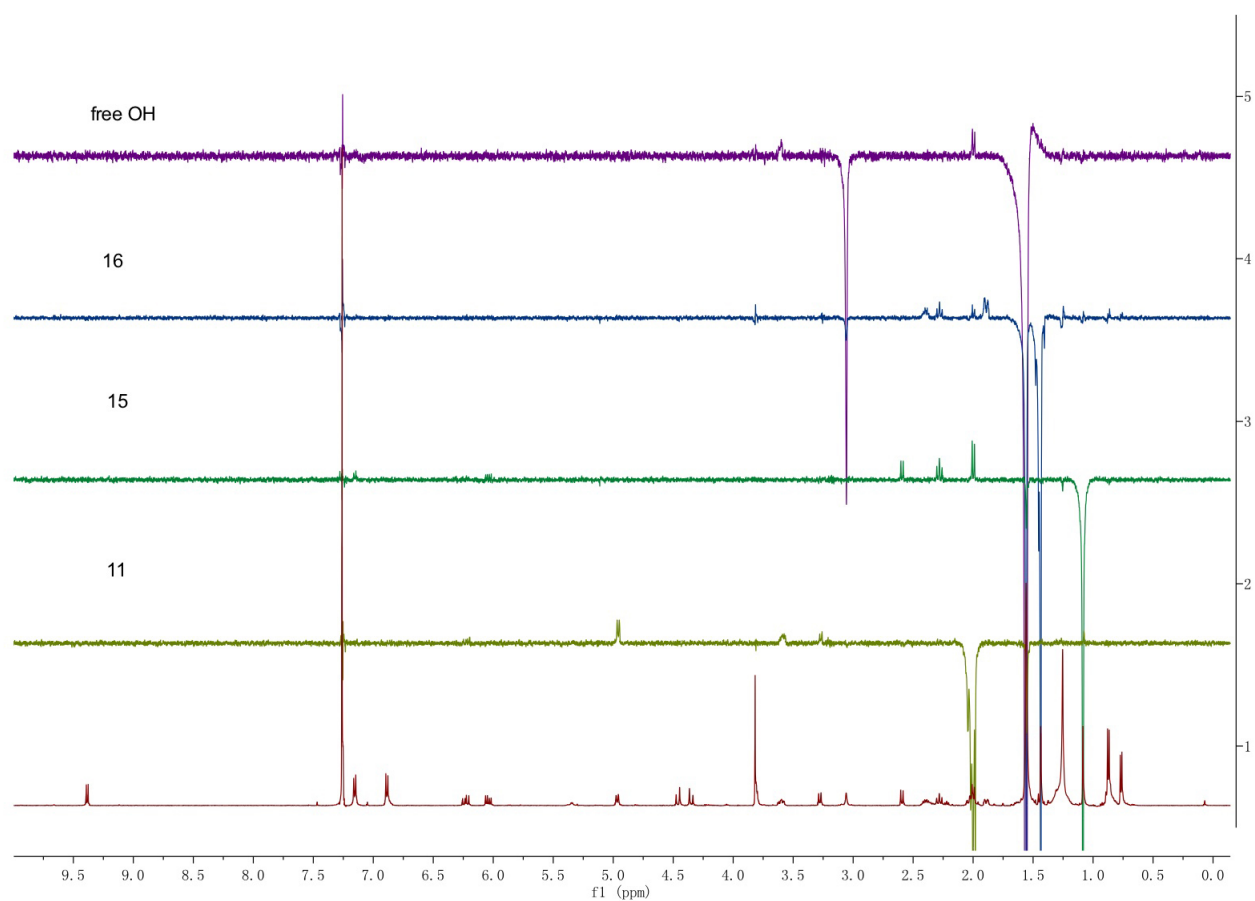NOE spectrum of **19** in  $\text{CDCl}_3$  (500 MHz)



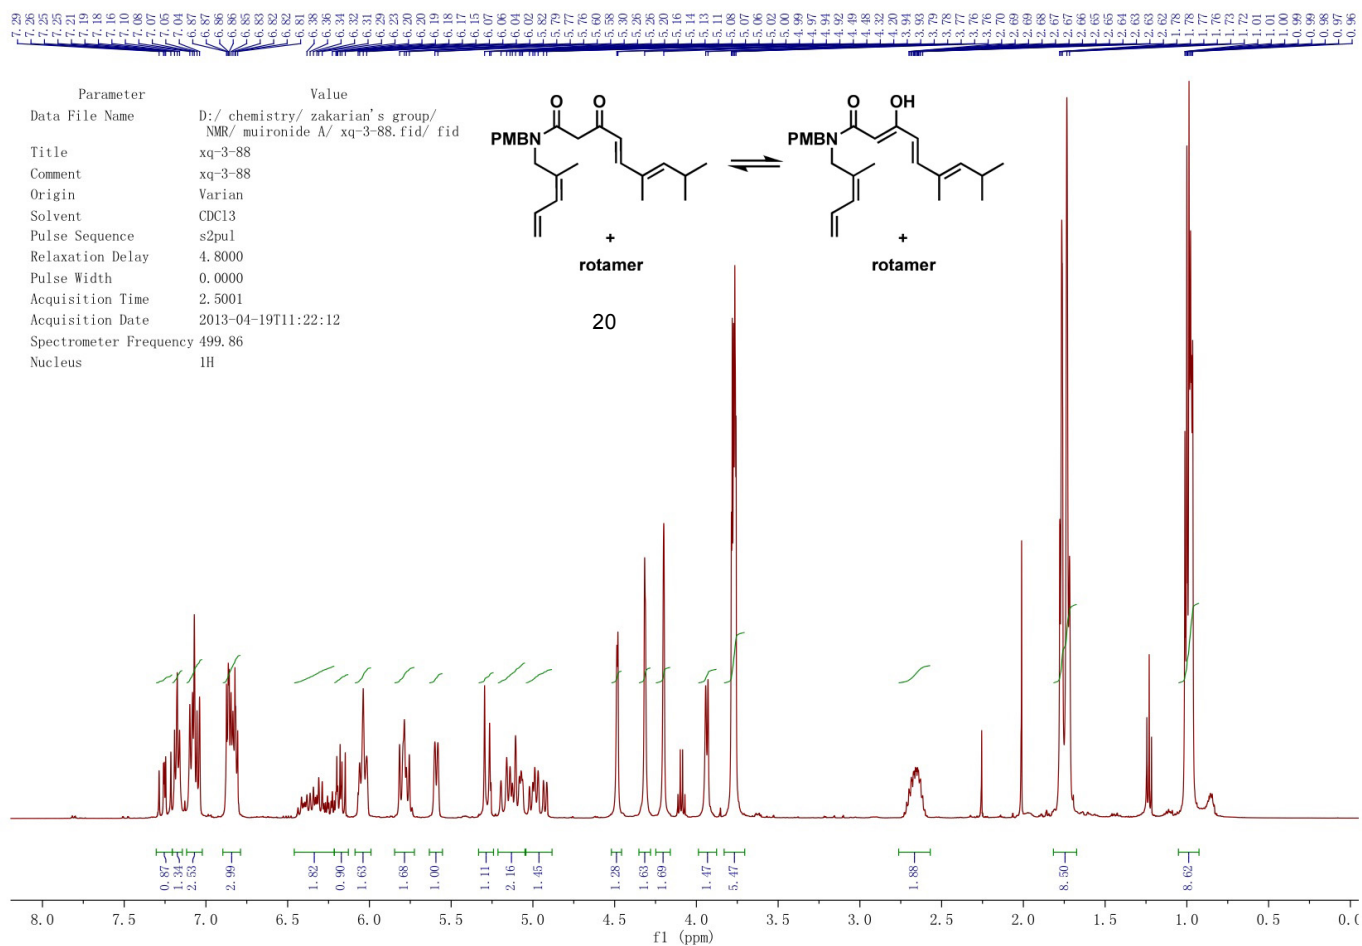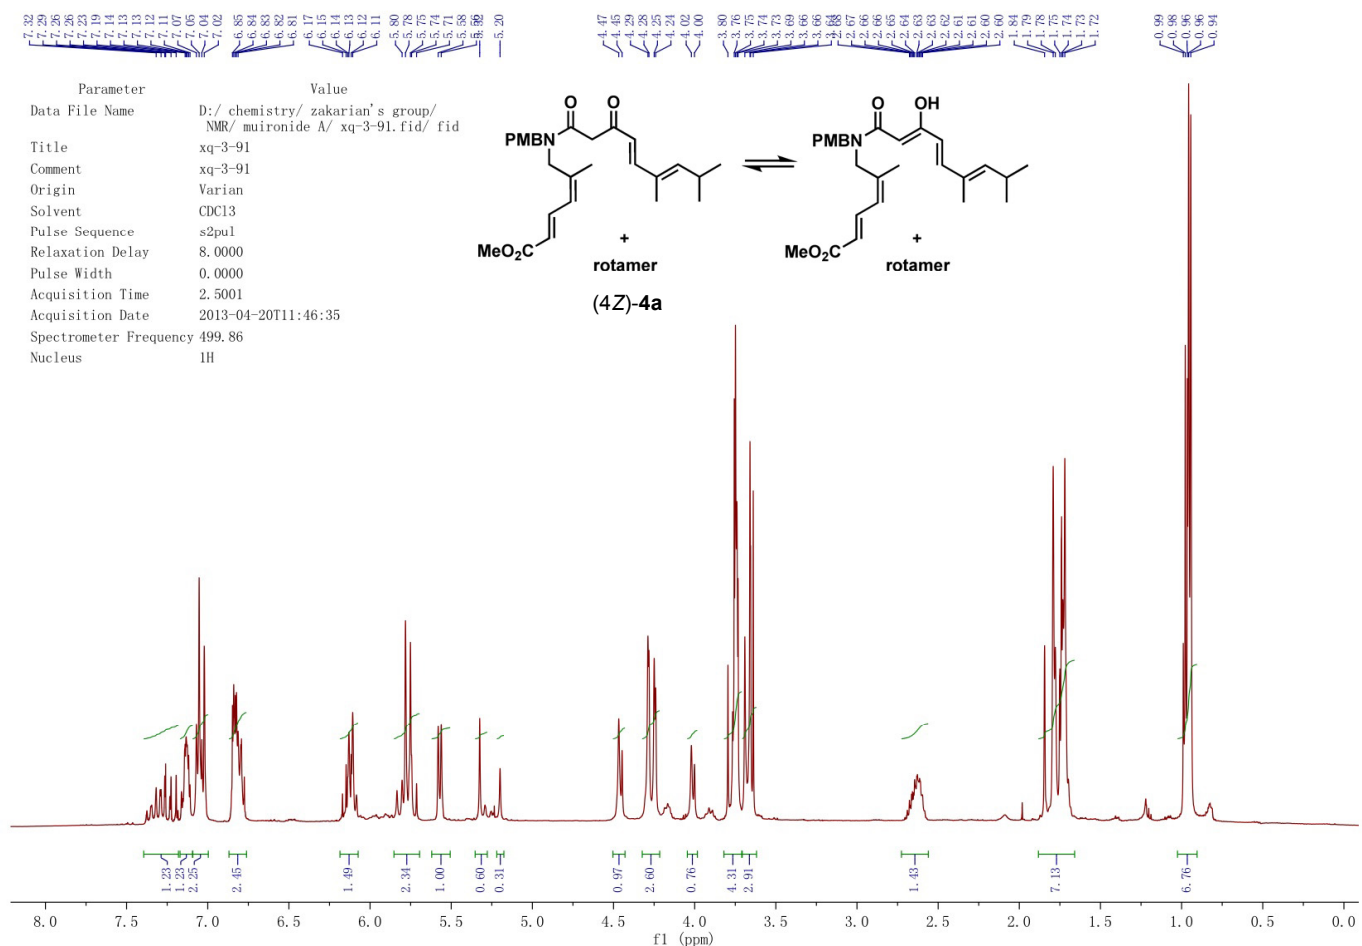



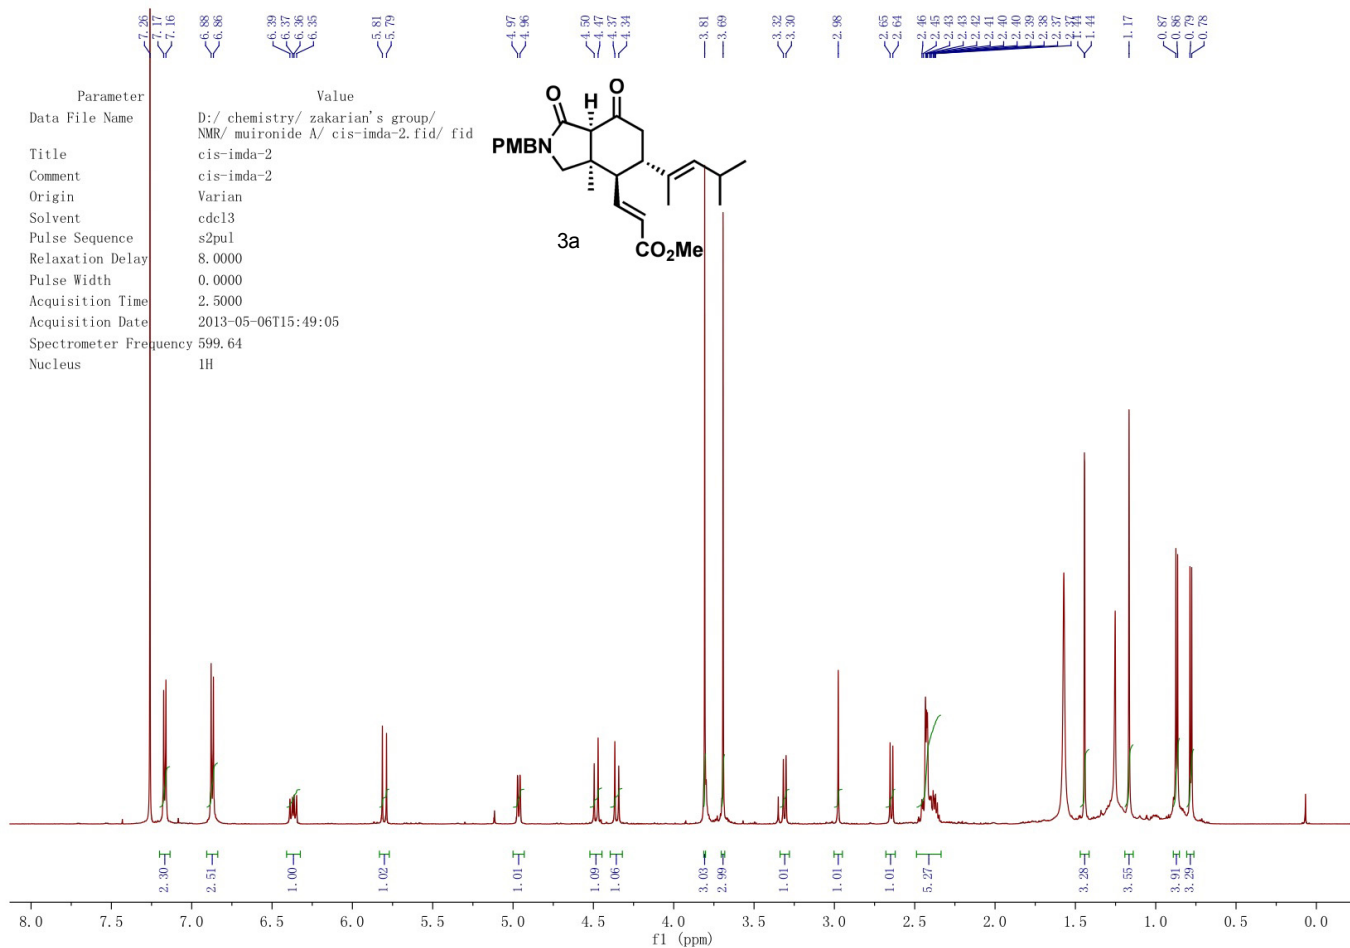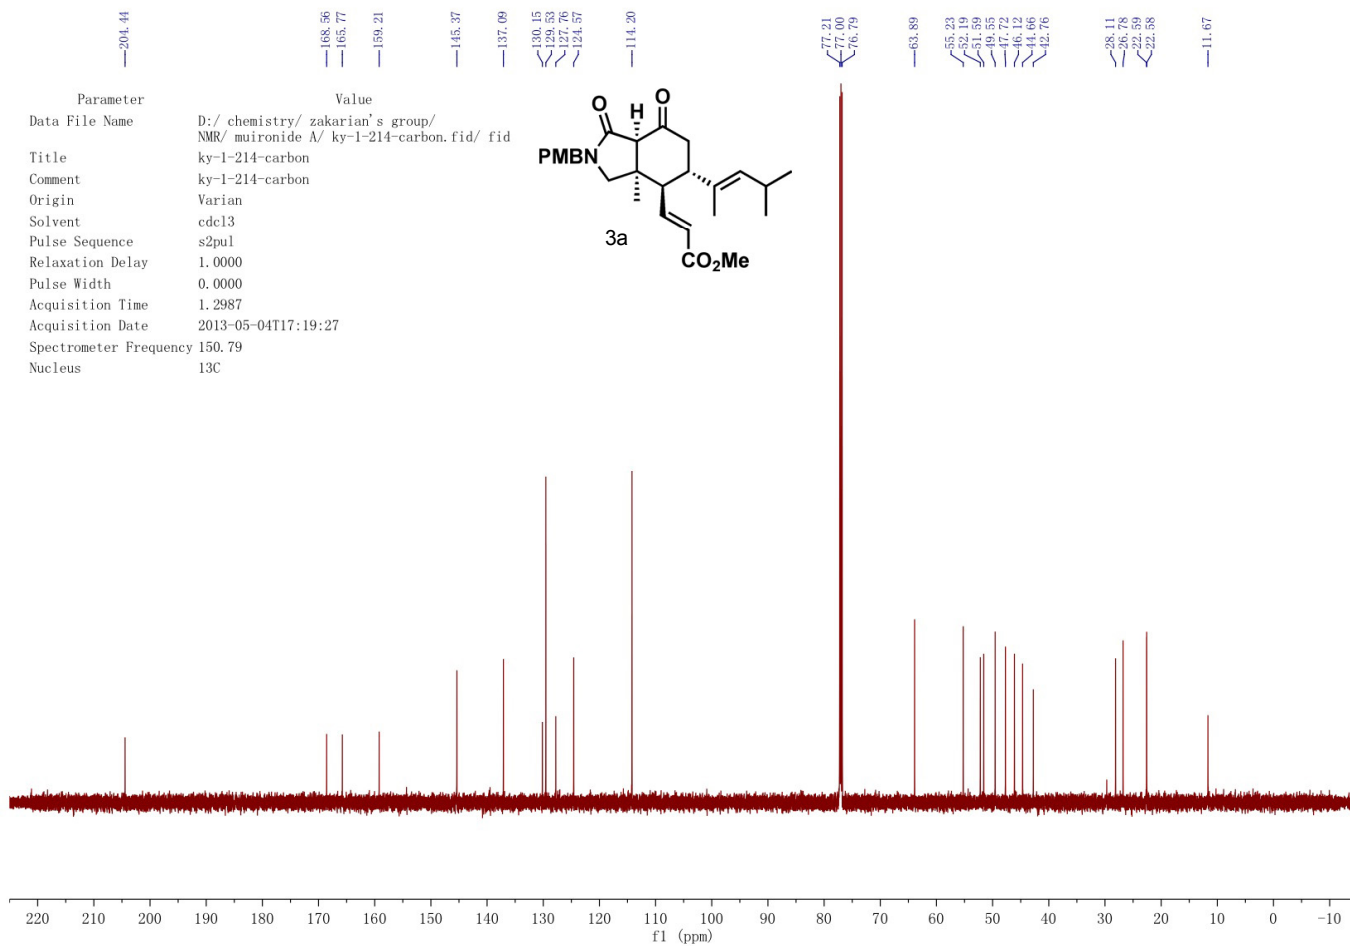

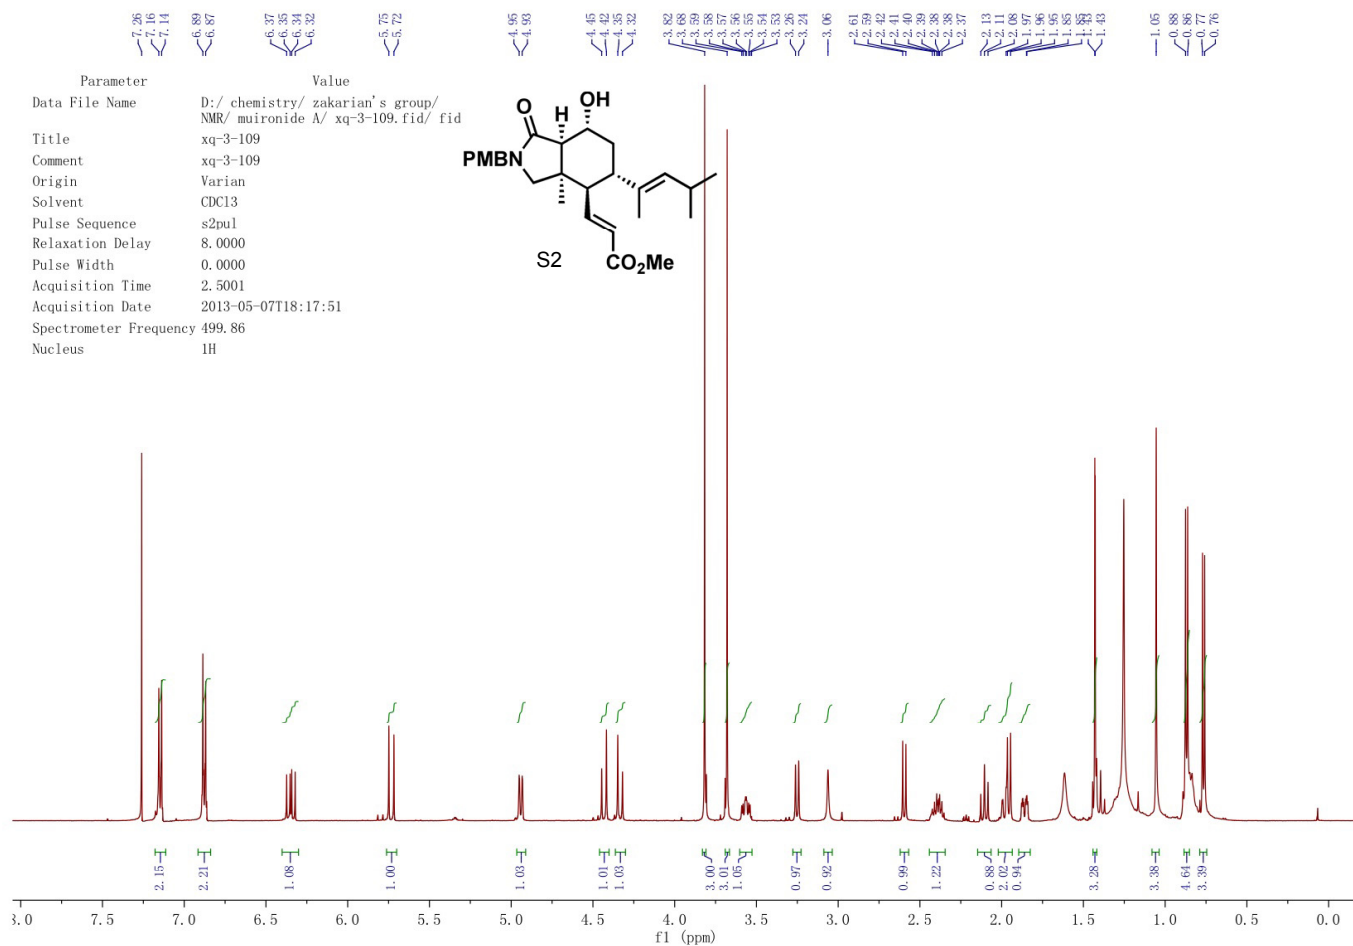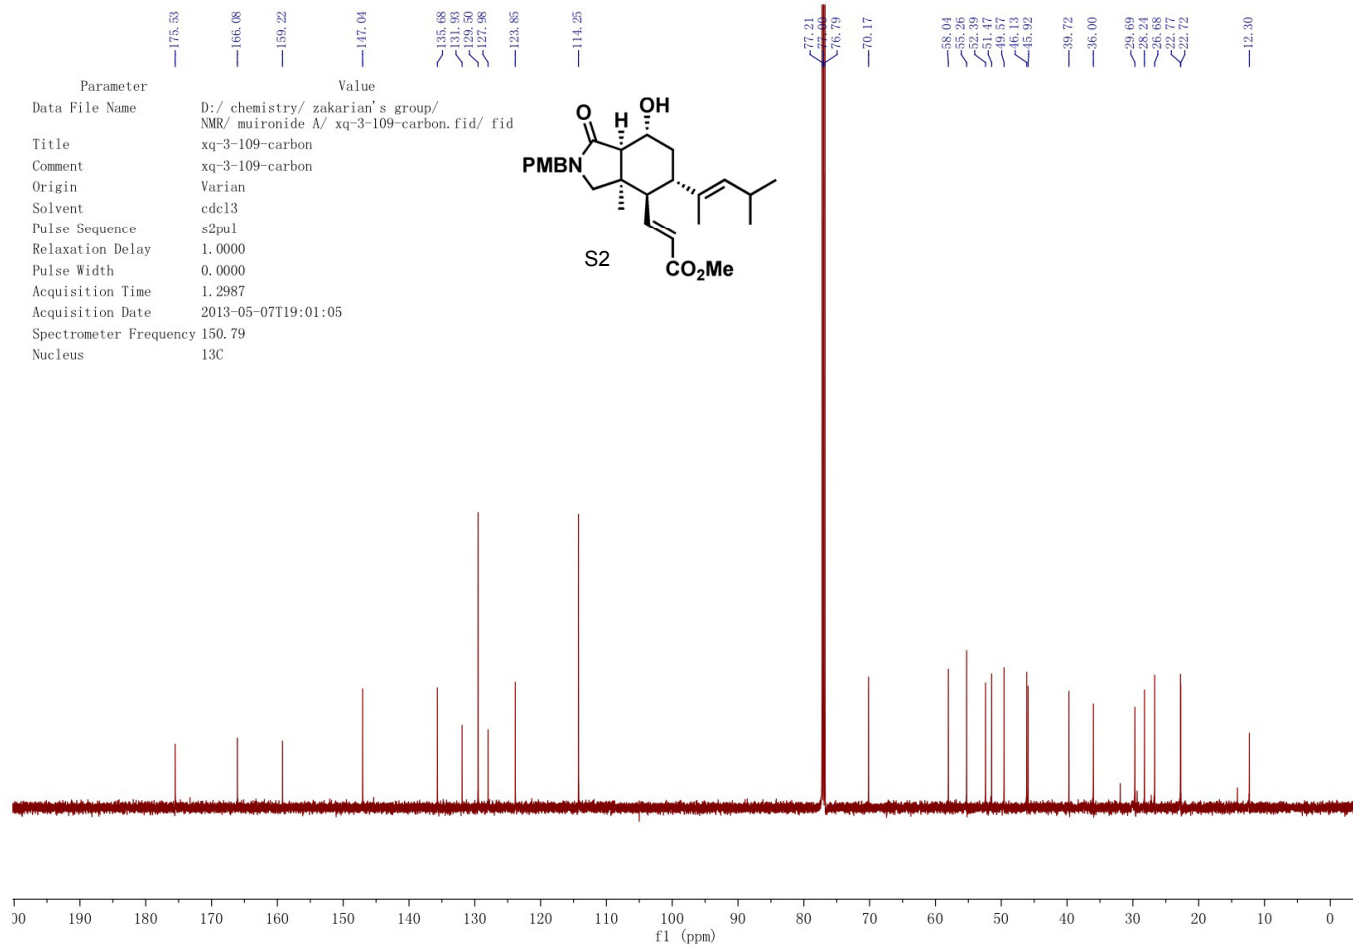

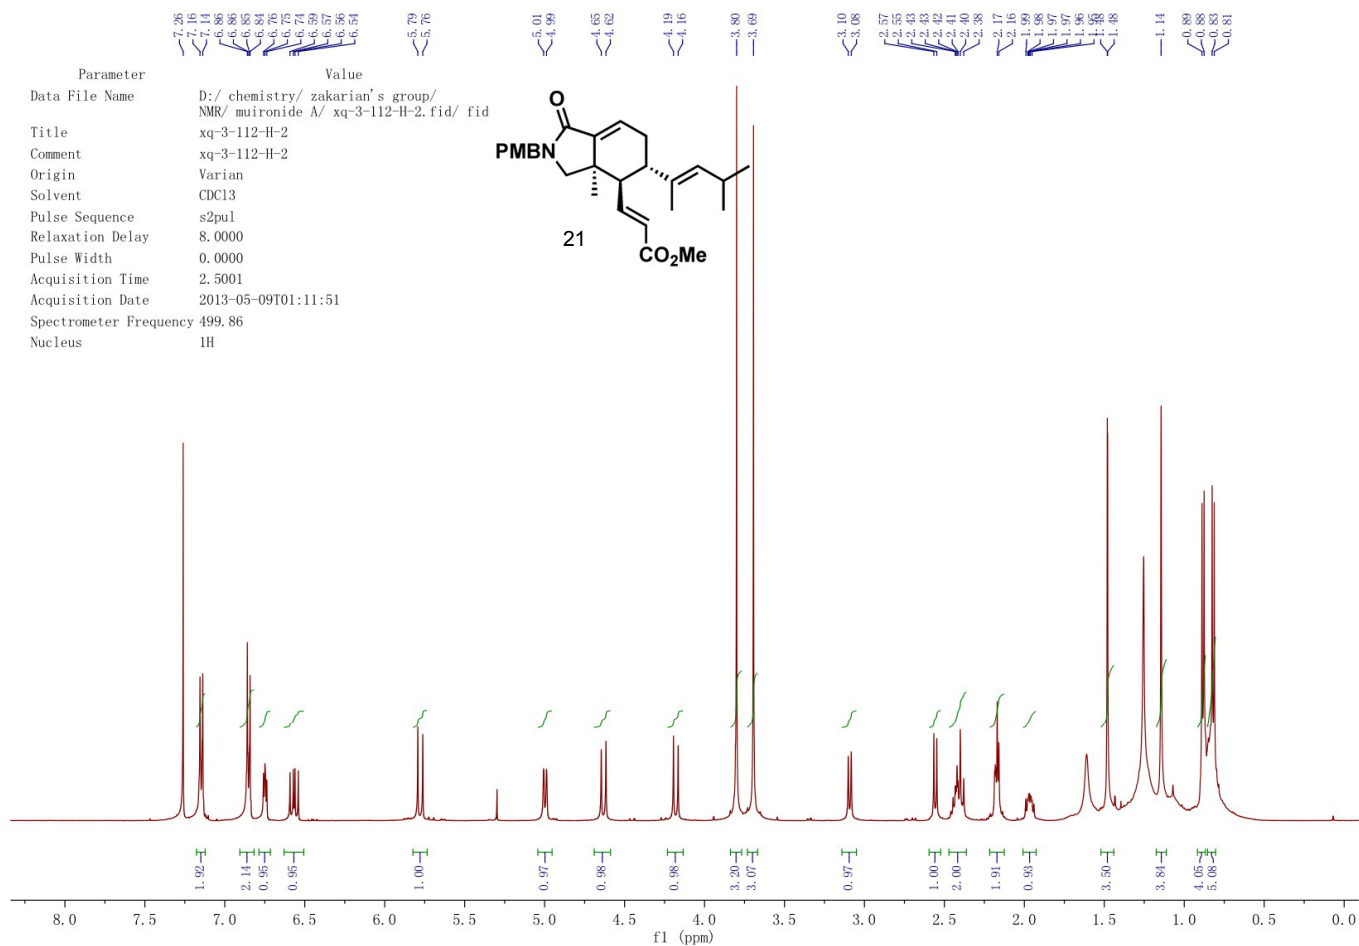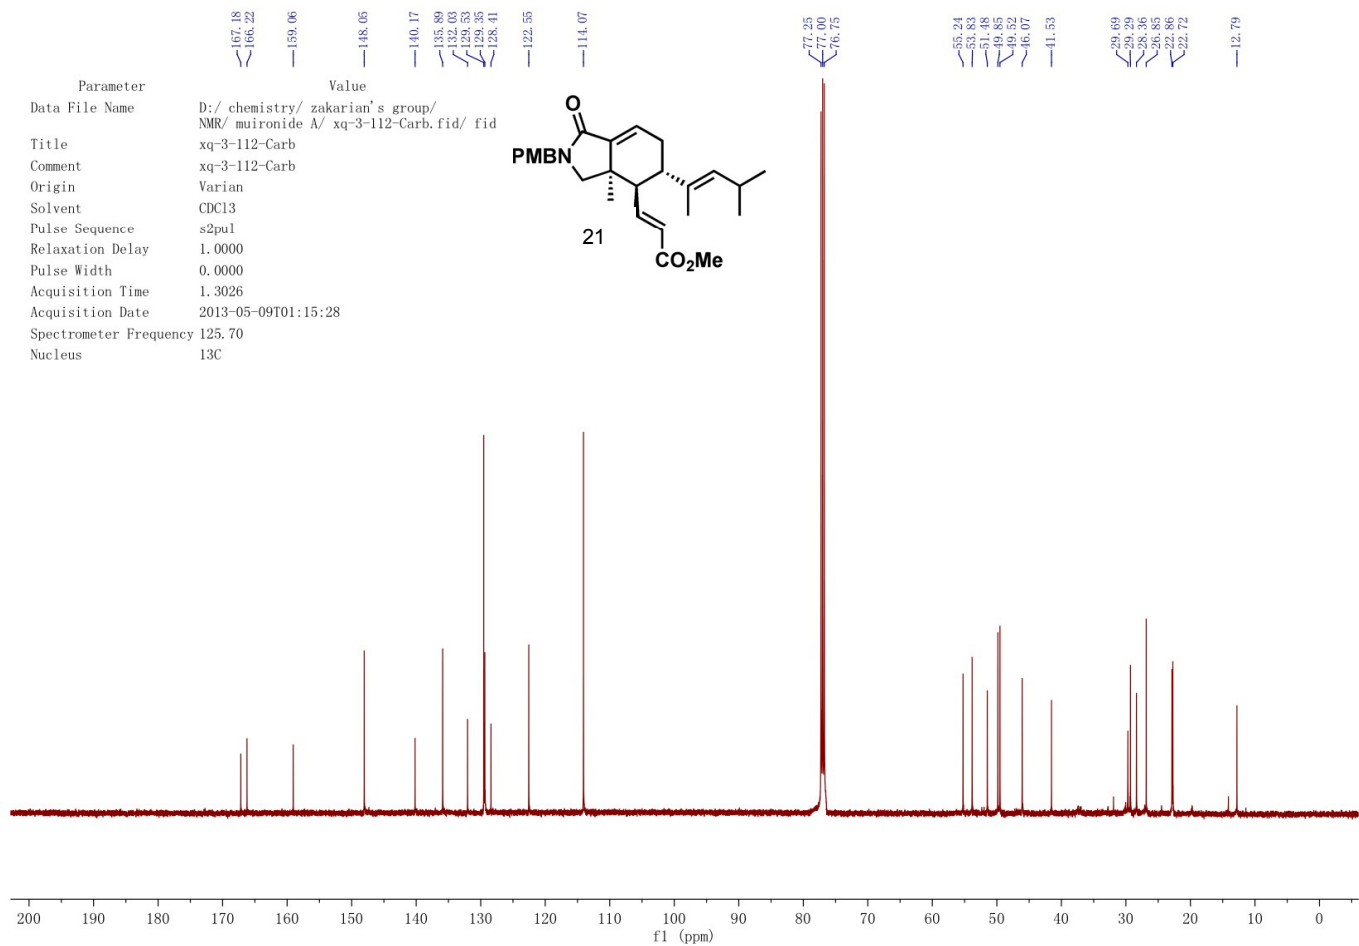

Supplement: NIHMS493777-supplement-1_si_002.pdf [file NIHMS493777-supplement-1_si_002.pdf]
